# Supplementary material for: Investigating the Evidence of Behavioral, Cognitive, and Psychiatric Endophenotypes in Autism: A Systematic Review
Source: Hindawi journal article supplement (doi:10.1155/2017/6346912), 2017-01-01
Supplement: f1 [file 6346912.f1.pdf]

Supplementary Table 1. Socio-Behavioral Endophenotype Matrix – Review of studies of parents of autistic probands.

| Domain                                                               | Method / Measure                                                         | Factors / Subscales          | Country                   | Study                          | ASD Parent Group Characteristics | Control Group Characteristics | Key Findings in relation to Proband Diagnosis  |                                                |
|----------------------------------------------------------------------|--------------------------------------------------------------------------|------------------------------|---------------------------|--------------------------------|----------------------------------|-------------------------------|------------------------------------------------|------------------------------------------------|
|                                                                      |                                                                          |                              |                           |                                |                                  |                               | P value                                        | Effect Size ( <i>d</i> )                       |
| <b>BAP Expression (Measures designed specifically to assess BAP)</b> | <b>Autism Spectrum Quotient (AQ)</b><br><i>Self-report Questionnaire</i> | Social Skills                | UK                        | Berthoz et al (2013) [40]      | ASD-P n = 87 (28%Fa)             | UA n = 47 (62%M)              | n.s.                                           | ASD-P vs. UA 0.36                              |
|                                                                      |                                                                          |                              | Australia                 | Bishop et al (2004a) [20]      | ASD-P n = 111 (65Mo/46Fa)        | N-P n = 85 (48Mo/37Fa)        | ASD-P > N-P**                                  | ASD-Mo vs. N-Mo 0.22<br>ASD-Fa vs. N-Fa 0.60   |
|                                                                      |                                                                          |                              | Turkey                    | Kadak et al (2014) [21]        | ASD-P n=72 (36Mo/36Fa)           | TD-P n=38 (19Mo/19Fa)         | ASD-P > TD-P**                                 | ASD-P vs. TD-P 0.5                             |
|                                                                      |                                                                          |                              | Turkey                    | Kose et al (2013) [18]         | ASD-P n = 100 (53Mo/47Fa)        | TD-P n = 100 (52Mo/48Fa)      | ASD-P > TD-P**                                 | ASD-Fa vs. TD-Fa 0.43<br>ASD-Mo vs. TD-Mo 0.30 |
|                                                                      |                                                                          |                              | Italy                     | Ruta et al (2012) [17]         | ASD-P n= 245 (130Mo/115Fa)       | TD-P n = 300 (150Mo/150Fa)    | ASD-P > TD-P**                                 | ASD-Fa vs. TD-Fa 0.25<br>ASD-Mo vs. TD-Mo 0.24 |
|                                                                      |                                                                          |                              | Netherlands               | Scheeren & Stauder (2008) [24] | ASD-P n= 25 (12Mo/13Fa)          | TD-P n= 25 (12Mo/13Fa)        | n.s.                                           |                                                |
|                                                                      |                                                                          |                              | UK                        | Wheelwright et al (2010) [22]  | ASD-P n= 2000 (1429Mo/571Fa)     | TD-P n= 1007 (658Mo/349Fa)    | ASD-P > TD-P***                                | ASD-Fa vs. TD-Fa 0.33<br>ASD-Mo vs. TD-Mo 0.46 |
|                                                                      | UK                                                                       | Whitehouse et al (2007) [23] | ASD-P n = 30 (20Mo/10Fa)  | SLI-P n= 25                    | n.s.                             | ASD-P vs. SLI-P 0.67          |                                                |                                                |
|                                                                      | Attention Switching                                                      | UK                           | Berthoz et al (2013) [40] | ASD-P n = 87 (28%Fa)           | UA n = 47 (62%M)                 | n.s.                          | ASD-P vs. UA 0.14                              |                                                |
|                                                                      |                                                                          | Australia                    | Bishop et al (2004a) [20] | ASD-P n = 111 (65Mo/46Fa)      | N-P n = 85 (48Mo/37Fa)           | n.s.                          | ASD-Mo vs. N-Mo 0.13<br>ASD-Fa vs. N-Fa 0.19   |                                                |
|                                                                      |                                                                          | Turkey                       | Kadak et al (2014) [21]   | ASD-P n=72 (36Mo/36Fa)         | TD-P n=38 (19Mo/19Fa)            | n.s.                          | ASD-P vs. TD-P 0.09                            |                                                |
|                                                                      |                                                                          | Turkey                       | Kose et al (2013) [18]    | ASD-P n = 100 (53Mo/47Fa)      | TD-P n = 100 (52Mo/48Fa)         | n.s.                          | ASD-Fa vs. TD-Fa 0.33<br>ASD-Mo vs. TD-Mo 0.15 |                                                |
|                                                                      |                                                                          | Italy                        | Ruta et al (2012) [17]    | ASD-P n= 245 (130Mo/115Fa)     | TD-P n = 300 (150Mo/150Fa)       | n.s.                          | ASD-Fa vs. TD-Fa 0.13<br>ASD-Mo vs. TD-Mo 0.03 |                                                |

|                     |             |                                |                              |                            |                           |                                                        |
|---------------------|-------------|--------------------------------|------------------------------|----------------------------|---------------------------|--------------------------------------------------------|
|                     | Netherlands | Scheeren & Stauder (2008) [24] | ASD-P n= 25 (12Mo/13Fa)      | TD-P n= 25 (12Mo/13Fa)     | n.s.                      |                                                        |
|                     | UK          | Wheelwright et al (2010) [22]  | ASD-P n= 2000 (1429Mo/571Fa) | TD-P n= 1007 (658Mo/349Fa) | <b>ASD-P &gt; TD-P***</b> | <b>ASD-Fa vs. TD-Fa 0.12<br/>ASD-Mo vs. TD-Mo 0.38</b> |
|                     | UK          | Whitehouse et al (2007) [23]   | ASD-P n = 30 (20Mo/10Fa)     | SLI-P n= 25                | <b>ASD-P &gt; SLI-P*</b>  | <b>ASD-P vs. SLI-P 0.67</b>                            |
| Attention to Detail | UK          | Berthoz et al (2013) [40]      | ASD-P n = 87 (28%Fa)         | UA n = 47 (62%M)           | n.s.                      | <b>ASD-P vs. UA 0.37</b>                               |
|                     | Australia   | Bishop et al (2004a) [20]      | ASD-P n = 111 (65Mo/46Fa)    | N-P n = 85 (48Mo/37Fa)     | n.s.                      | <b>ASD-Mo vs. N-Mo 0.29<br/>ASD-Fa vs. N-Fa 0.12</b>   |
|                     | Turkey      | Kadak et al (2014) [21]        | ASD-P n=72 (36Mo/36Fa)       | TD-P n=38 (19Mo/19Fa)      | n.s.                      | <b>ASD-P vs. TD-P 0.22</b>                             |
|                     | Turkey      | Kose et al (2013) [18]         | ASD-P n = 100 (53Mo/47Fa)    | TD-P n = 100 (52Mo/48Fa)   | n.s.                      | <b>ASD-Fa vs. TD-Fa 0.04<br/>ASD-Mo vs. TD-Mo 0.14</b> |
|                     | Italy       | Ruta et al (2012) [17]         | ASD-P n= 245 (130Mo/115Fa)   | TD-P n = 300 (150Mo/150Fa) | n.s.                      | <b>ASD-Fa vs. TD-Fa 0.04<br/>ASD-Mo vs. TD-Mo 0.03</b> |
|                     | Netherlands | Scheeren & Stauder (2008) [24] | ASD-P n= 25 (12Mo/13Fa)      | TD-P n= 25 (12Mo/13Fa)     | <b>TD-Mo &gt; ASD-Mo*</b> |                                                        |
|                     | UK          | Wheelwright et al (2010) [22]  | ASD-P n= 2000 (1429Mo/571Fa) | TD-P n= 1007 (658Mo/349Fa) | n.s.                      | <b>ASD-Fa vs. TD-Fa 0.13<br/>ASD-Mo vs. TD-Mo 0.13</b> |
|                     | UK          | Whitehouse et al (2007) [23]   | ASD-P n = 30 (20Mo/10Fa)     | SLI-P n= 25                | n.s.                      | <b>ASD-P vs. SLI-P 0.13</b>                            |
| Communication       | UK          | Berthoz et al (2013) [40]      | ASD-P n = 87 (28%Fa)         | UA n = 47 (62%M)           | n.s.                      | <b>ASD-P vs. UA 0.13</b>                               |
|                     | Australia   | Bishop et al (2004a) [20]      | ASD-P n = 111 (65Mo/46Fa)    | N-P n = 85 (48Mo/37Fa)     | <b>ASD-P &gt; N-P**</b>   | <b>ASD-Mo vs. N-Mo 0.19<br/>ASD-Fa vs. N-Fa 0.52</b>   |
|                     | Turkey      | Kadak et al (2014) [21]        | ASD-P n=72 (36Mo/36Fa)       | TD-P n=38 (19Mo/19Fa)      | n.s.                      | <b>ASD-P vs. TD-P 0.32</b>                             |

|                |             |                                |                               |                             |                           |                                                              |
|----------------|-------------|--------------------------------|-------------------------------|-----------------------------|---------------------------|--------------------------------------------------------------|
|                | Turkey      | Kose et al (2013) [18]         | ASD-P n = 100 (53Mo/47Fa)     | TD-P n = 100 (52Mo/48Fa)    | <b>ASD-P &gt; TD-P**</b>  | <b>ASD-Fa vs. TD-Fa 0.20</b><br><b>ASD-Mo vs. TD-Mo 0.62</b> |
|                | Italy       | Ruta et al (2012) [17]         | ASD-P n = 245 (130Mo/115Fa)   | TD-P n = 300 (150Mo/150Fa)  | <b>ASD-P &gt; TD-P**</b>  | <b>ASD-Fa vs. TD-Fa 0.02</b><br><b>ASD-Mo vs. TD-Mo 0.01</b> |
|                | Netherlands | Scheeren & Stauder (2008) [24] | ASD-P n = 25 (12Mo/13Fa)      | TD-P n = 25 (12Mo/13Fa)     | <b>n.s.</b>               |                                                              |
|                | UK          | Wheelwright et al (2010) [22]  | ASD-P n = 2000 (1429Mo/571Fa) | TD-P n = 1007 (658Mo/349Fa) | <b>ASD-P &gt; TD-P***</b> | <b>ASD-Fa vs. TD-Fa 0.22</b><br><b>ASD-Mo vs. TD-Mo 0.41</b> |
|                | UK          | Whitehouse et al (2007) [23]   | ASD-P n = 30 (20Mo/10Fa)      | SLI-P n = 25                | <b>ASD-P &gt; SLI-P*</b>  | <b>ASD-P vs. SLI-P 0.63</b>                                  |
| Imagination    | UK          | Berthoz et al (2013) [40]      | ASD-P n = 87 (28%Fa)          | UA n = 47 (62%M)            | <b>n.s.</b>               | <b>ASD-P vs. UA 0.10</b>                                     |
|                | Australia   | Bishop et al (2004a) [20]      | ASD-P n = 111 (65Mo/46Fa)     | N-P n = 85 (48Mo/37Fa)      | <b>n.s.</b>               | <b>ASD-Mo vs. N-Mo 0.07</b><br><b>ASD-Fa vs. N-Fa 0.19</b>   |
|                | Turkey      | Kadak et al (2014) [21]        | ASD-P n = 72 (36Mo/36Fa)      | TD-P n = 38 (19Mo/19Fa)     | <b>n.s.</b>               | <b>ASD-P vs. TD-P 0.02</b>                                   |
|                | Turkey      | Kose et al (2013) [18]         | ASD-P n = 100 (53Mo/47Fa)     | TD-P n = 100 (52Mo/48Fa)    | <b>n.s.</b>               | <b>ASD-Fa vs. TD-Fa 0.03</b><br><b>ASD-Mo vs. TD-Mo 0.07</b> |
|                | Italy       | Ruta et al (2012) [17]         | ASD-P n = 245 (130Mo/115Fa)   | TD-P n = 300 (150Mo/150Fa)  | <b>n.s.</b>               | <b>ASD-Fa vs. TD-Fa 0.06</b><br><b>ASD-Mo vs. TD-Mo 0.57</b> |
|                | Netherlands | Scheeren & Stauder (2008) [24] | ASD-P n = 25 (12Mo/13Fa)      | TD-P n = 25 (12Mo/13Fa)     | <b>n.s.</b>               |                                                              |
|                | UK          | Wheelwright et al (2010) [22]  | ASD-P n = 2000 (1429Mo/571Fa) | TD-P n = 1007 (658Mo/349Fa) | <b>ASD-P &gt; TD-P***</b> | <b>ASD-Fa vs. TD-Fa 0.04</b><br><b>ASD-Mo vs. TD-Mo 0.29</b> |
|                | UK          | Whitehouse et al (2007) [23]   | ASD-P n = 30 (20Mo/10Fa)      | SLI-P n = 25                | <b>n.s.</b>               | <b>ASD-P vs. SLI-P 0.41</b>                                  |
| AQ Total Score | UK          | Berthoz et al (2013) [39]      | ASD-P n = 87 (28%Fa)          | UA n = 47 (62%M)            | <b>n.s.</b>               | <b>ASD-P vs. UA 0.06</b>                                     |

|                                                      |                                              |             |                                |                                                          |                            |                                     |                                                |
|------------------------------------------------------|----------------------------------------------|-------------|--------------------------------|----------------------------------------------------------|----------------------------|-------------------------------------|------------------------------------------------|
|                                                      |                                              | Turkey      | Kadak et al (2014) [21]        | ASD-P n=72 (36Mo/36Fa)                                   | TD-P n=38 (19Mo/19Fa)      | n.s.                                | ASD-P vs. TD-P 0.39                            |
|                                                      |                                              | Turkey      | Kose et al (2013) [18]         | ASD-P n = 100 (53Mo/47Fa)                                | TD-P n = 100 (52Mo/48Fa)   | ASD-P > TD-P*                       | ASD-Fa vs. TD-Fa 0.34<br>ASD-Mo vs. TD-Mo 0.27 |
|                                                      |                                              | Italy       | Ruta et al (2012) [17]         | ASD-P n= 245 (130Mo/115Fa)                               | TD-P n = 300 (150Mo/150Fa) | ASD-P > TD-P**                      | ASD-Fa vs. TD-Fa 0.30<br>ASD-Mo vs. TD-Mo 0.29 |
|                                                      |                                              | Netherlands | Scheeren & Stauder (2008) [24] | ASD-P n= 25 (12Mo/13Fa)                                  | TD-P n= 25 (12Mo/13Fa)     | n.s                                 | ASD-Fa vs. TD-Fa 0.30<br>ASD-Mo vs. TD-Mo 0.73 |
|                                                      |                                              | UK          | Wheelwright et al (2010) [22]  | ASD-P n= 2000 (1429Mo/571Fa)                             | TD-P n= 1007 (658Mo/349Fa) | ASD-P > TD-P***                     | ASD-Fa vs. TD-Fa 0.17<br>ASD-Mo vs. TD-Mo 0.38 |
|                                                      |                                              | UK          | Whitehouse et al (2007) [23]   | ASD-P n = 30 (20Mo/10Fa)                                 | SLI-P n= 25                | ASD-P > SLI-P*                      | ASD-P vs. SLI-P 0.63                           |
|                                                      | AQ<br>Social/Communication<br>score combined | USA         | Ingersoll et al (2011) [25]    | ASD-Mo n = 71 (Only Mo)                                  | N-Mo n = 94 (Only Mo)      | ASD-Mo > N-Mo*                      | ASD-Mo vs. N-Mo 0.33                           |
|                                                      | F1 (communication & socialization)           | France      | Robel et al (2014) [19]        | ASD-P n = 66 (35Mo/31Fa)                                 | TD-P n = 127 (67Mo/60Fa)   | ASD-P > TD-P*                       | ASD-P vs. TD-P 1.34                            |
|                                                      | F2 (imagination & rigidity)                  | France      | Robel et al (2014) [19]        | ASD-P n = 66 (35Mo/31Fa)                                 | TD-P n = 127 (67Mo/60Fa)   | n.s.                                | ASD-P vs. TD-P 0.24                            |
|                                                      | Global score (F1 & F2 combined)              | France      | Robel et al (2014) [19]        | ASD-P n = 66 (35Mo/31Fa)                                 | TD-P n = 127 (67Mo/60Fa)   | ASD-P > TD-P*                       | ASD-P vs. TD-P 0.76                            |
| <b>Broader Autism Phenotype Questionnaire (BAPQ)</b> | Aloof                                        | USA         | Hurley et al (2007) [26]       | ASD-P = 86 (40Mo/46Fa)<br>BAP(+) n = 27<br>BAP(-) n = 59 | N-P = 64 (32Mo/32Fa)       | BAP(+) > BAP(-), N-P***             | BAP(+) vs. BAP(-) 1.49<br>BAP(+) vs. N-P 1.30  |
| <i>Self &amp; Informant Report Questionnaire</i>     |                                              | USA         | Sasson et al (2013) [27]       | ASD-P n=711 (50.5% Fa)                                   | N-P n = 981 (49.9% Fa)     | ASD-Fa > N-Fa**<br>ASD-Mo > N-Mo*** | ASD-Fa vs. N-Fa 0.26<br>ASD-Mo vs. N-Mo 0.34   |

|                                                                                                               |                      |                                         |                              |                                                          |                            |                                                          |                                                                                         |
|---------------------------------------------------------------------------------------------------------------|----------------------|-----------------------------------------|------------------------------|----------------------------------------------------------|----------------------------|----------------------------------------------------------|-----------------------------------------------------------------------------------------|
|                                                                                                               | Rigid                | USA                                     | Hurley et al (2007) [26]     | ASD-P = 86 (40Mo/46Fa)<br>BAP(+) n = 27<br>BAP(-) n = 59 | N-P = 64 (32Mo/32Fa)       | <b>BAP(+) &gt; BAP(-), N-P***</b>                        | <b>BAP(+) vs. BAP(-) 0.77</b><br><b>BAP(+) vs. N-P 0.73</b>                             |
|                                                                                                               |                      | USA                                     | Sasson et al (2013) [27]     | ASD-P n=711 (50.5% Fa)                                   | N-P n = 981 (49.9% Fa)     | <b>ASD-Fa &gt; N-Fa***</b><br><b>ASD-Mo &gt; N-Mo***</b> | <b>ASD-Fa vs. N-Fa 0.35</b><br><b>ASD-Mo vs. N-Mo 0.29</b>                              |
|                                                                                                               | Pragmatic Language   | USA                                     | Hurley et al (2007) [26]     | ASD-P = 86 (40Mo/46Fa)<br>BAP(+) n = 27<br>BAP(-) n = 59 | N-P = 64 (32Mo/32Fa)       | <b>BAP(+) &gt; BAP(-)** , N-P*</b>                       | <b>BAP(+) vs. BAP(-) 0.94</b><br><b>BAP(+) vs. N-P 1.13</b>                             |
|                                                                                                               |                      | USA                                     | Sasson et al (2013) [27]     | ASD-P n=711 (50.5% Fa)                                   | N-P n = 981 (49.9% Fa)     | <b>ASD-Fa &gt; N-Fa**</b><br><b>ASD-Mo &gt; N-Mo***</b>  | <b>ASD-Fa vs. N-Fa 0.28</b><br><b>ASD-Mo vs. N-Mo 0.44</b>                              |
|                                                                                                               | Total score          | USA                                     | Hurley et al (2007) [26]     | ASD-P = 86 (40Mo/46Fa)<br>BAP(+) n = 27<br>BAP(-) n = 59 | N-P = 64 (32Mo/32Fa)       | <b>BAP(+) &gt; BAP(-), N-P***</b>                        | <b>BAP(+) vs. BAP(-) 1.49</b><br><b>BAP(+) vs. N-P 1.43</b>                             |
|                                                                                                               |                      | USA                                     | Sasson et al (2013) [27]     | ASD-P n=711 (50.5% Fa)                                   | N-P n = 981 (49.9% Fa)     | <b>ASD-Fa &gt; N-Fa***</b><br><b>ASD-Mo &gt; N-Mo***</b> | <b>ASD-Fa vs. N-Fa 0.37</b><br><b>ASD-Mo vs. N-Mo 0.45</b>                              |
| <b>Broader Phenotype Autism Symptom Scale (BPASS)</b><br><i>Interview &amp; Direct Behavioral Observation</i> | Social               | USA                                     | Bernier et al (2012) [28]    | MPX-P n=39<br>SPX-P n=22                                 | DD-P n = 20<br>TD-P n = 20 | <b>MPX-P &gt; SPX-P* &gt; DD-P** &gt; TD-P*</b>          | <b>MPX-P vs. DD-P 0.84</b><br><b>MPX-P vs. TD-P 0.77</b><br><b>MPX-P vs. SPX-P 0.75</b> |
|                                                                                                               | Expressiveness       | USA                                     | Bernier et al (2012) [28]    | MPX-P n=39<br>SPX-P n=22                                 | DD-P n = 20<br>TD-P n = 20 | <b>MPX-P &gt; TD-P***</b>                                | <b>MPX-P vs. TD-P 1.28</b>                                                              |
|                                                                                                               | Conversation         | USA                                     | Bernier et al (2012) [28]    | MPX-P n=39<br>SPX-P n=22                                 | DD-P n = 20<br>TD-P n = 20 | n.s.                                                     |                                                                                         |
|                                                                                                               | Restricted Interests | USA                                     | Bernier et al (2012) [28]    | MPX-P n=39<br>SPX-P n=22                                 | DD-P n = 20<br>TD-P n = 20 | <b>MPX-P &gt; TD-P*</b>                                  | <b>MPX-P vs. TD-P 0.93</b>                                                              |
| <b>Communication Checklist - Adult Version (CC-A)</b><br><i>Informant Report</i>                              | Language Structure   | UK / Ireland / USA / Canada / Australia | Whitehouse et al (2010) [29] | ASD-P n= 238 (115Mo/123Fa)                               | UA n= 187 (90M/97F)        | n.s.                                                     | <b>ASD-P vs. UA 0.04</b>                                                                |
|                                                                                                               | Pragmatic Skills     | UK / Ireland / USA / Canada / Australia | Whitehouse et al (2010) [29] | ASD-P n= 238 (115Mo/123Fa)                               | UA n= 187 (90M/97F)        | n.s.                                                     | <b>ASD-P vs. UA 0.18</b>                                                                |

|                                                       |                                      |                                         |                                                      |                                  |                                                                                      |                                                                                      |                          |
|-------------------------------------------------------|--------------------------------------|-----------------------------------------|------------------------------------------------------|----------------------------------|--------------------------------------------------------------------------------------|--------------------------------------------------------------------------------------|--------------------------|
| <i>Questionnaire</i>                                  | Social Engagement                    | UK / Ireland / USA / Canada / Australia | Whitehouse et al (2010) [29]                         | ASD-P n= 238 (115Mo/123Fa)       | UA n= 187 (90M/97F)                                                                  | <b>ASD-P &lt; UA*</b>                                                                | <b>ASD-P vs. UA 0.43</b> |
|                                                       | Total Score (1 SD below mean)        | UK / Ireland / USA / Canada / Australia | Whitehouse et al (2010) [29]                         | ASD-P n= 238 (115Mo/123Fa)       | UA n= 187 (90M/97F)                                                                  | <b>ASD-P &lt; UA*</b>                                                                |                          |
| <b>Family History Interview / Schedule (FHI/FHS)</b>  | Social                               | USA                                     | (FHS) Piven et al (1997a) [6]                        | MPX-P n= 48 (25Mo/23Fa)          | DS-P n = 60 (30Mo/30Fa)                                                              | <b>MPX-P &gt; DS-P**</b><br><b>MPX-Fa &gt; DS-Fa***</b><br><b>MPX-Mo &gt; DS-Mo*</b> |                          |
|                                                       |                                      | UK                                      | Pickles et al (2013) [31]<br><i>Modified version</i> | ASD-P n = 193 (97Mo/96Fa)        | SLI-P n = 103 (54Mo/49Fa)<br>SLI+ASD-P n = 43 (23Mo/20Fa)<br>DS-P n = 70 (35Mo/35Fa) | <b>ASD-P &gt; SLI-P*</b>                                                             |                          |
| <i>Interview</i>                                      | Communication                        | USA                                     | (FHS) Piven et al (1997a) [6]                        | MPX-P n= 48 (25Mo/23Fa)          | DS-P n = 60 (30Mo/30Fa)                                                              | <b>n.s.</b>                                                                          |                          |
|                                                       |                                      | UK                                      | Pickles et al (2013) [31]<br><i>Modified version</i> | ASD-P n = 193 (97Mo/96Fa)        | SLI-P n = 103 (54Mo/49Fa)<br>SLI+ASD-P n = 43 (23Mo/20Fa)<br>DS-P n = 70 (35Mo/35Fa) | <b>n.s.</b>                                                                          |                          |
|                                                       | <i>Definite &amp; Probable ELRCD</i> | USA                                     | Folstein et al (1999) [30]                           | ASD-P n = 166                    | DS-P n = 75                                                                          | <b>ASD-P &gt; DS-P**</b>                                                             |                          |
|                                                       | <i>Definite only ELRCD</i>           | USA                                     | Folstein et al (1999) [30]                           | ASD-P n = 166                    | DS-P n = 75                                                                          | <b>ASD-P &gt; DS-P*</b>                                                              |                          |
|                                                       | Stereotyped behaviours               | USA                                     | (FHS) Piven et al (1997a) [6]                        | MPX-P n= 48 (25Mo/23Fa)          | DS-P n = 60 (30Mo/30Fa)                                                              | <b>MPX-P &gt; DS-P*</b>                                                              |                          |
| <b>The Modified Personality Assessment Schedule –</b> | Aloof                                | USA                                     | Losh et al (2008) [34]                               | MPX n=48 (25Mo/23Fa)<br>SPX n=78 | DS-P n=60                                                                            | <b>MPX-P &gt; DS-P**</b><br><b>SPX-P &gt; DS-P**</b><br><b>MPX-P &gt; SPX-P*</b>     |                          |

**Revised (MPAS-R)**

*Interview*

|                      |     |                                |                                      |                                                 |                                                                                   |
|----------------------|-----|--------------------------------|--------------------------------------|-------------------------------------------------|-----------------------------------------------------------------------------------|
|                      | USA | Losh et al (2012) [35]         | ASD-Mo n = 89 (All Mo)               | FXS-Mo n = 49 (All Mo)<br>TD-Mo n = 23 (All Mo) | n.s.                                                                              |
|                      | USA | (MPAS) Piven et al (1994) [32] | ASD-P n = 87 (45Mo/42Fa)             | DS-P n = 38 (19Mo/19Fa)                         | <b>ASD-P &gt; DS-P**</b>                                                          |
|                      | USA | Piven et al (1997b) [33]       | MPX-P n= 39                          | DS-P n = 58                                     | <b>MPX-P &gt; DS-P**</b>                                                          |
| Anxious              | USA | Losh et al (2008) [34]         | MPX-P n=48 (25Mo/23Fa)<br>SPX-P n=78 | DS-P n=60                                       | <b>MPX-P &gt; DS-P**</b><br><b>SPX-P &gt; DS-P*</b><br><b>MPX-P &gt; SPX-P**</b>  |
|                      | USA | Piven et al (1997b) [33]       | MPX-P n= 39                          | DS-P n = 58                                     | <b>MPX-P &gt; DS-P**</b><br><b>MPX-Fa &gt; DS-Fa**</b>                            |
| Hypersensitive       | USA | Losh et al (2008) [34]         | MPX-P n=48 (25Mo/23Fa)<br>SPX-P n=78 | DS-P n=60                                       | <b>MPX-P &gt; DS-P***</b><br><b>SPX-P &gt; DS-P*</b><br><b>MPX-P &gt; SPX-P*</b>  |
|                      | USA | Piven et al (1997b) [33]       | MPX-P n= 39                          | DS-P n = 58                                     | <b>MPX-P &gt; DS-P**</b>                                                          |
| Overly conscientious | USA | Losh et al (2008) [34]         | MPX n=48 (25Mo/23Fa)<br>SPX n=78     | DS-P n=60                                       | <b>MPX-P &gt; DS-P*</b><br><b>SPX-P &gt; DS-P*</b>                                |
|                      | USA | Losh et al (2012) [35]         | ASD-Mo n = 89 (All Mo)               | FXS-Mo n = 49 (All Mo)<br>TD-Mo n = 23 (All Mo) | n.s.                                                                              |
|                      | USA | Piven et al (1997b) [33]       | MPX-P n= 39                          | DS-P n = 58                                     | n.s.                                                                              |
| Rigid                | USA | Losh et al (2008) [34]         | MPX-P n=48 (25Mo/23Fa)<br>SPX-P n=78 | DS-P n=60                                       | <b>MPX-P &gt; DS-P***</b><br><b>SPX-P &gt; DS-P*</b><br><b>MPX-P &gt; SPX-P**</b> |
|                      | USA | Losh et al (2012) [35]         | ASD-Mo n = 89 (All Mo)               | FXS-Mo n = 49 (All Mo)<br>TD-Mo n = 23 (All Mo) | <b>ASD-P, FXS-P &gt; TD-P*</b>                                                    |

|                                                      |                                                      |               |                                |                                      |                                      |                                                     |                                 |  |
|------------------------------------------------------|------------------------------------------------------|---------------|--------------------------------|--------------------------------------|--------------------------------------|-----------------------------------------------------|---------------------------------|--|
| <b>Pragmatic Rating Scale (PRS)</b>                  | Untactful                                            | USA           | Piven et al (1997b) [6]        | MPX-P n= 39                          | DS-P n = 58                          | <b>MPX-P &gt; DS-P**</b>                            |                                 |  |
|                                                      |                                                      | USA           | Losh et al (2008) [34]         | MPX-Pn=48 (25Mo/23Fa)<br>SPX-P n=78  | DS-P n=60                            | <b>MPX-P &gt; DS-P*</b><br><b>MPX-P &gt; SPX-P*</b> |                                 |  |
|                                                      | Undemonstrative                                      | USA           | (MPAS) Piven et al (1994) [32] | ASD-P n = 87 (45Mo/42Fa)             | DS-P n = 38 (19Mo/19Fa)              | <b>ASD-P &gt; DS-P*</b>                             |                                 |  |
|                                                      |                                                      | USA           | Piven et al (1997b) [33]       | MPX-P n= 39                          | DS-P n = 58                          | n.s.                                                |                                 |  |
|                                                      | Unresponsive                                         | USA           | (MPAS) Piven et al (1994) [32] | ASD-P n = 87 (45Mo/42Fa)             | DS-P n = 38 (19Mo/19Fa)              | <b>ASD-P &gt; DS-P*</b>                             |                                 |  |
|                                                      |                                                      | USA           | Piven et al (1997b) [33]       | MPX-P n= 39                          | DS-P n = 58                          | n.s.                                                |                                 |  |
|                                                      | Pragmatic language violations                        | USA           | Piven et al (1997b) [33]       | MPX-P n= 39                          | DS-P n = 58                          | n.s.                                                |                                 |  |
|                                                      |                                                      | USA           | Piven et al (1997b) [33]       | MPX-P n= 39                          | DS-P n = 58                          | n.s.                                                |                                 |  |
|                                                      | <i>Interview &amp; Direct Behavioral Observation</i> | Speech errors | USA                            | Losh et al (2008) [34]               | MPX-P n=48 (25Mo/23Fa)<br>SPX-P n=78 | DS-P n=60                                           | <b>SPX-P &gt; DS-P**</b>        |  |
|                                                      |                                                      |               | USA                            | Losh et al (2012) [35]               | ASD-Mo n = 89 (All Mo)               | FXS-Mo n = 49 (All Mo)<br>TD-Mo n = 23 (All Mo)     | <b>ASD-Mo/FXS-Mo &gt;TD-Mo*</b> |  |
| <i>Interview &amp; Direct Behavioral Observation</i> | Speech errors                                        | USA           | Piven et al (1997b) [33]       | MPX-P n= 38                          | DS-P n = 58                          | <b>MPX-P &gt; DS-P**</b>                            | <b>MPX-P vs. DS-P 0.80</b>      |  |
|                                                      |                                                      | USA           | Losh et al (2008) [34]         | MPX-P n=48 (25Mo/23Fa)<br>SPX-P n=78 | DS-P n=60                            | <b>SPX-P &gt; DS-P**</b>                            |                                 |  |
|                                                      | Total score (blind ratings)                          | USA           | Piven et al (1997b) [33]       | MPX-P n= 38                          | DS-P n = 58                          | <b>MPX-P &gt; DS-P**</b>                            | <b>MPX-P vs. DS-P 0.93</b>      |  |
|                                                      |                                                      | USA           | Landa et al (1992) [36]        | ASD-P n = 21                         | TD/DS n = 19                         | <b>ASD-P &gt; TD/DS-P*</b>                          | <b>ASD-P vs. TD/DS-P 0.71</b>   |  |
| Total score (blind &                                 | USA                                                  | Landa et al   | ASD-P n = 43                   | TD/DS n = 21                         | <b>ASD-P &gt; TD/DS-P***</b>         | <b>ASD-P vs. TD/DS-P 0.87</b>                       |                                 |  |



|                                                      |                                                     |                       |                                  |                                                                                      |                                              |                                                        |                                                                                                                                                                                                |
|------------------------------------------------------|-----------------------------------------------------|-----------------------|----------------------------------|--------------------------------------------------------------------------------------|----------------------------------------------|--------------------------------------------------------|------------------------------------------------------------------------------------------------------------------------------------------------------------------------------------------------|
|                                                      | unblind ratings combined)                           |                       | (1992) [36]                      |                                                                                      | TD n = 11<br>DS n = 10                       |                                                        |                                                                                                                                                                                                |
| <b>Pragmatic Rating Scale - Modified (PRS-M)</b>     | Emotional expressiveness and awareness of the other | USA                   | Ruser et al (2007) [37]          | ASD-P n= 47 (49% Fa)                                                                 | SLI-P n= 47 (45% Fa)<br>DS-P n = 21 (48% Fa) | <b>ASD-P &gt; DS-P*</b>                                | <b>ASD-P vs. SLI-P 0.25</b><br><b>ASD-P vs. DS-P 0.58</b>                                                                                                                                      |
| <i>Interview &amp; Direct Behavioral Observation</i> | Communicative performance                           | USA                   | Ruser et al (2007) [37]          | ASD-P n= 47 (49% Fa)                                                                 | SLI-P n= 47 (45% Fa)<br>DS-P n = 21 (48% Fa) | n.s.                                                   | <b>ASD-P vs. SLI-P 0.06</b><br><b>ASD-P vs. DS-P 0.40</b>                                                                                                                                      |
|                                                      | Over-talkativeness                                  | USA                   | Ruser et al (2007) [37]          | ASD-P n= 47 (49% Fa)                                                                 | SLI-P n= 47 (45% Fa)<br>DS-P n = 21 (48% Fa) | <b>ASD-P &gt; DS-P*</b>                                | <b>ASD-P vs. SLI-P 0</b><br><b>ASD-P vs. DS-P 0.53</b>                                                                                                                                         |
|                                                      | Language                                            | USA                   | Ruser et al (2007) [37]          | ASD-P n= 47 (49% Fa)                                                                 | SLI-P n= 47 (45% Fa)<br>DS-P n = 21 (48% Fa) | <b>ASD-P &gt; DS-P**</b>                               | <b>ASD-P vs. SLI-P 0.14</b><br><b>ASD-P vs. DS-P 0.92</b>                                                                                                                                      |
|                                                      | Total score                                         | USA                   | Ruser et al (2007) [37]          | ASD-P n= 47 (49% Fa)                                                                 | SLI-P n= 47 (45% Fa)<br>DS-P n = 21 (48% Fa) | <b>ASD-P &gt; DS-P**</b>                               | <b>ASD-P vs. SLI-P 0.09</b><br><b>ASD-P vs. DS-P 1.14</b>                                                                                                                                      |
| <b>Social Responsiveness Scale (SRS)</b>             |                                                     | Belgium / Netherlands | De la Marche et al (2012) [38]   | ASD-P n = 275 (143Mo/132Fa)<br>MPX-P n = 93 (48Mo/45Fa)<br>SPX-P n = 129 (68Mo/61Fa) | UA n = 595 (295F/300M)                       | <b>ASD-Fa &gt; UA-M**</b><br><b>MPX-Fa &gt; UA-M*</b>  | <b>ASD-Fa vs. UA-M 0.30</b><br><b>ASD-Mo vs. UA-F 0.28</b><br><b>MPX-Fa vs. UA-M 0.44</b><br><b>SPX-Fa vs. UA-M 0.19</b><br><b>MPX-Fa vs. SPX-Fa 0.23</b>                                      |
| <i>Self &amp; Informant Report Questionnaire</i>     |                                                     | USA                   | Schwichtenberg et al (2010) [39] | MPX-P n = 21 (10Mo/11Fa)<br>SPX-P n = 239 (115Mo/124Fa)                              | TD-P n = 163 (81Mo/82Fa)                     | <b>MPX-Fa &gt; TD-Fa*</b><br><b>SPX-Fa &gt; TD-Fa*</b> | <b>MPX-Fa vs. TD-Fa 0.90</b><br><b>SPX-Fa vs. TD-Fa 0.35</b><br><b>MPX-Fa vs. SPX-Fa 0.38</b><br><b>MPX-Mo vs. TD-Mo 0.27</b><br><b>SPX-Mo vs. TD-Mo 0.02</b><br><b>MPX-Mo vs. SPX-Mo 0.18</b> |

|                                                                |                                               |                                                                   |        |                           |                                      |                         |                                                       |                            |
|----------------------------------------------------------------|-----------------------------------------------|-------------------------------------------------------------------|--------|---------------------------|--------------------------------------|-------------------------|-------------------------------------------------------|----------------------------|
| <b>Other measures of Personality and Friendships</b>           | <b>The Friendship Interview</b>               | Quality of friendships (higher scores indicate fewer friendships) | USA    | Losh et al (2008) [34]    | MPX-P n=48 (25Mo/23Fa)<br>SPX-P n=78 | DS-P n=60               | <b>SPX-P &gt; DS-P**</b><br><b>MPX-P &gt; SPX-P*</b>  |                            |
|                                                                |                                               |                                                                   | USA    | Piven et al (1997b) [33]  | MPX-P n= 38                          | DS-P n = 58             | <b>MPX-P &gt; DS-P***</b>                             | <b>MPX-P vs. DS-P 1.14</b> |
|                                                                | <b>The NEO Personality Inventory (NEO-PI)</b> | Neuroticism                                                       | USA    | Losh et al (2008) [34]    | MPX-P n=48 (25Mo/23Fa)<br>SPX-P n=78 | DS-P n=60               | <b>SPX-P &gt; DS-P***</b><br><b>MPX-P &gt; SPX-P*</b> |                            |
|                                                                |                                               |                                                                   | USA    | Piven et al (1997b) [33]  | MPX-P n= 38                          | DS-P n = 58             | <b>MPX-P &gt; DS-P***</b>                             | <b>MPX-P vs. DS-P 0.79</b> |
| <b>Reciprocal Social Interaction</b><br><br><b>Alexithymia</b> | <b>Toronto Alexithymia Scale (TAS-20)</b>     | Difficulty Identifying Feelings (DIF)                             | Canada | Szatmari et al (2008) [9] | ASD-P n = 439 (237Mo/202Fa)          | PW-P n = 45 (28Mo/17Fa) | n.s.                                                  |                            |
|                                                                |                                               |                                                                   | UK     | Berthoz et al (2013) [40] | ASD-P n = 87 (28%Fa)                 | UA n = 47 (62%M)        | n.s.                                                  | <b>ASD-P vs. UA 0.25</b>   |
|                                                                |                                               | Difficulty Describing Feelings (DDF)                              | Canada | Szatmari et al (2008) [9] | ASD-P n = 439 (237Mo/202Fa)          | PW-P n = 45 (28Mo/17Fa) | n.s.                                                  |                            |
|                                                                |                                               |                                                                   | UK     | Berthoz et al (2013) [40] | ASD-P n = 87 (28%Fa)                 | UA n = 47 (62%M)        | n.s.                                                  | <b>ASD-P vs. UA 0.14</b>   |
|                                                                |                                               | Externally-Oriented Thinking (EOT)                                | Canada | Szatmari et al (2008) [9] | ASD-P n = 439 (237Mo/202Fa)          | PW-P n = 45 (28Mo/17Fa) | n.s.                                                  |                            |
|                                                                |                                               |                                                                   | UK     | Berthoz et al (2013) [40] | ASD-P n = 87 (28%Fa)                 | UA n = 47 (62%M)        | n.s.                                                  | <b>ASD-P vs. UA 0.16</b>   |
|                                                                |                                               | Total score                                                       | Canada | Szatmari et al (2008) [9] | ASD-P n = 439 (237Mo/202Fa)          | PW-P n = 45 (28Mo/17Fa) | <b>ASD-P &gt; PW-P*</b>                               |                            |
|                                                                |                                               |                                                                   | UK     | Berthoz et al             | ASD-P n = 87                         | UA n = 47               | n.s.                                                  | <b>ASD-P vs. UA 0.23</b>   |

|                                        |                                                           |                                           |               |                           |                             |                                                    |                             |                                                      |
|----------------------------------------|-----------------------------------------------------------|-------------------------------------------|---------------|---------------------------|-----------------------------|----------------------------------------------------|-----------------------------|------------------------------------------------------|
|                                        |                                                           |                                           |               | (2013) [40]               | (28%Fa)                     | (62%M)                                             |                             |                                                      |
| <b>Anhedonia</b>                       | <b>Bermond-Vorst Alexithymia Questionnaire-B (BVAQ-B)</b> | Total score                               | UK            | Berthoz et al (2013) [40] | ASD-P n = 87 (28%Fa)        | UA n = 47 (62%M)                                   | n.s.                        | <b>ASD-P vs. UA 0.15</b>                             |
|                                        |                                                           | Cognitive score                           | UK            | Berthoz et al (2013) [40] | ASD-P n = 87 (28%Fa)        | UA n = 47 (62%M)                                   | n.s.                        | <b>ASD-P vs. UA 0.19</b>                             |
|                                        |                                                           | Affective score                           | UK            | Berthoz et al (2013) [40] | ASD-P n = 87 (28%Fa)        | UA n = 47 (62%M)                                   | n.s.                        | <b>ASD-P vs. UA 0.02</b>                             |
|                                        | <b>Revised Social Anhedonia Scale (SAS)</b>               | Total score                               | UK            | Berthoz et al (2013) [40] | ASD-P n = 87 (28%Fa)        | UA n = 47 (62%M)                                   | n.s.                        | <b>ASD-P vs. UA 0.25</b>                             |
|                                        |                                                           | <b>Physical Anhedonia Scale (PAS)</b>     | Total score   | UK                        | Berthoz et al (2013) [40]   | ASD-P n = 87 (28%Fa)                               | UA n = 47 (62%M)            | <b>ASD-P &gt; UA**</b>                               |
|                                        | <b>Social and Narrative Language</b>                      | <b>Grice's Conversational Maxims Task</b> | No. of errors | Italy                     | Di Michele et al (2007) [8] | ASD n = 46                                         | DS n=14<br>TD n=12          | <b>ASD-P &gt; TD-P***</b><br><b>ASD-P &gt; DS-P*</b> |
| <b>Spontaneous Narrative Discourse</b> |                                                           | Story length (mean o. of clauses)         | USA           | Landa et al (1991) [41]   | ASD-P n = 41                | TD/DS-P n = 23 total<br>TD-P n = 10<br>DS-P n = 13 | n.s.                        | <b>ASD-P vs. TD/DS-P 0.35</b>                        |
|                                        |                                                           | Stories w/ complete episodes              | USA           | Landa et al (1991) [41]   | ASD-P n = 41                | TD/DS-P n = 23 total<br>TD-P n = 10<br>DS-P n = 13 | <b>ASD-P &lt; TD/DS-P**</b> | <b>ASD-P vs. TD/DS-P 0.71</b>                        |
|                                        |                                                           | Stories w/ multiple episodes              | USA           | Landa et al (1991) [41]   | ASD-P n = 41                | TD/DS-P n = 23 total<br>TD-P n = 10<br>DS-P n = 13 | <b>ASD-P &lt; TD/DS-P**</b> |                                                      |
|                                        |                                                           | Stories w/ incomplete episodes            | USA           | Landa et al (1991) [41]   | ASD-P n = 41                | TD/DS-P n = 23 total<br>TD-P n = 10                | <b>ASD-P &gt; TD/DS-P*</b>  | <b>ASD-P vs. TD/DS-P 0.50</b>                        |

|                                                                                                           |                                         |                      |     |                            |                          |                                                                   |                                                                                                                                                              |                                                                                                                                                                                             |
|-----------------------------------------------------------------------------------------------------------|-----------------------------------------|----------------------|-----|----------------------------|--------------------------|-------------------------------------------------------------------|--------------------------------------------------------------------------------------------------------------------------------------------------------------|---------------------------------------------------------------------------------------------------------------------------------------------------------------------------------------------|
|                                                                                                           |                                         | Mean overall quality | USA | Landa et al (1991) [41]    | ASD-P n = 41             | DS-P n = 13<br>TD/DS-P n = 23 total<br>TD-P n = 10<br>DS-P n = 13 | <b>ASD-P &lt; TD/DS-P**</b>                                                                                                                                  | <b>ASD-P vs. TD/DS-P 0.73</b>                                                                                                                                                               |
| <b>Repetitive, restrictive behaviors and interests</b><br><br><i>(Everyday Preferences and abilities)</i> | <b>Real-life Skills and Preferences</b> | Social items         | UK  | Briskman et al (2001) [42] | ASD-P n = 42 (21Mo/21Fa) | DLX-P n = 27 (14Mo/13Fa)<br>TD-P n = 28 (14Mo/14Fa)               | <b>ASD-P &gt; DLX-P &gt; TD-P*</b><br><b>ASD-Fa &gt; DLX-Fa**</b><br><b>ASD-Fa &gt; TD-Fa**</b><br><b>ASD-Mo &gt; DLX-Mo**</b><br><b>ASD-Mo &gt; TD-Mo**</b> | <b>ASD-P vs. DLX-P 0.92</b><br><b>ASD-P vs. TD-P 0.91</b><br><b>ASD-Fa vs. DLX-Fa 1.03</b><br><b>ASD-Fa vs. TD-Fa 1.11</b><br><b>ASD-Mo vs. DLX-Mo 0.89</b><br><b>ASD-Mo vs. TD-Mo 0.77</b> |
|                                                                                                           |                                         | Non-social items     | UK  | Briskman et al (2001) [42] | ASD-P n = 42 (21Mo/21Fa) | DLX-P n = 27 (14Mo/13Fa)<br>TD-P n = 28 (14Mo/14Fa)               | <b>ASD-P &gt; TD-P**</b><br><b>ASD-Fa &gt; TD-Fa*</b>                                                                                                        | <b>ASD-P vs. DLX-P 0.44</b><br><b>ASD-P vs. TD-P 0.76</b><br><b>ASD-Fa vs. DLX-Fa 0.37</b><br><b>ASD-Fa vs. TD-Fa 0.9</b><br><b>ASD-Mo vs. DLX-Mo 0.54</b><br><b>ASD-Mo vs. TD-Mo 0.64</b>  |

Note: ASD, Autism Spectrum Disorder; BAP, Broad Autism Phenotype; BAP(+), BAP present; BAP (-), BAP absent; P, Parent; Mo, Mother; Fa, Father; M, Male; F, Female; MPX, Multiple incidence autism families; SPX, Single incidence autism families; DD, Developmental delay without autism; DLX, Dyslexia; DS, Down Syndrome; FXS, Fragile X Syndrome; N, Normative sample; PWD, Prader Willie; SLI, Specific Language Impairment; TD, typically developing; UA, Unaffected adult

\*p<0.05; \*\*p<0.01; \*\*\*p<0.001

**Supplementary Table 2. Cognitive Endophenotype Matrix – Review of studies of parents of autistic probands.**

| Domain                                  | Method / Measure       | Factors / Subscales     | Country                 | Study                      | ASD Parent Group Characteristics                     | Control Group Characteristics                       | Key Findings in relation to Proband Diagnosis |                                                                                                                                                          |
|-----------------------------------------|------------------------|-------------------------|-------------------------|----------------------------|------------------------------------------------------|-----------------------------------------------------|-----------------------------------------------|----------------------------------------------------------------------------------------------------------------------------------------------------------|
|                                         |                        |                         |                         |                            |                                                      |                                                     | P value                                       | Effect Size ( <i>d</i> )                                                                                                                                 |
| <b>General Intellectual Functioning</b> | <i>Weschler Scales</i> | Total Score or Estimate | Australia               | Bishop et al (2004a) [20]  | ASD-P n = 121 (69Mo/52Fa)                            | N-P n = 89 (52Mo/37Fa)                              | n.s.                                          | ASD-Mo vs. N-Mo 0.20<br>ASD-Fa vs. N-Fa 0.21                                                                                                             |
|                                         |                        |                         | Australia               | Bishop et al (2004b) [53]  | ASD-P = 142 (77Mo/65Fa)                              | N-P n = 96 (57Mo/39Fa)                              | n.s.                                          | ASD-Mo vs. N-Mo 0.19<br>ASD-Fa vs. N-Fa 0.07                                                                                                             |
|                                         |                        |                         | Netherlands             | de Jonge et al (2006) [65] | MPX-P n = 51 (26Mo/25Fa)                             | DS-P n = 54 (28Fa/26Mo)                             | n.s.                                          | MPX-P vs. DS-P 0.11                                                                                                                                      |
|                                         |                        |                         | Netherlands             | de Jonge et al (2007) [67] | MPX-P n = 51 (26Mo/25Fa)                             | DS-P n = 52 (25Fa/27Mo)                             | n.s.                                          | MPX-P vs. DS-P 0.17                                                                                                                                      |
|                                         |                        |                         | Netherlands             | de Jonge et al (2009) [66] | MPX-P n = 51 (26Mo/25Fa)                             | DS-P n = 57 (28Mo/29Fa)                             | n.s.                                          | MPX-P vs. DS-P 0.09                                                                                                                                      |
|                                         |                        |                         | USA                     | Folstein et al (1999) [30] | ASD-P n = 166                                        | DS-P n = 75                                         | n.s.                                          | ASD-P vs. DS-P 0.19                                                                                                                                      |
|                                         |                        |                         | UK                      | Fombonne et al (1997) [44] | ASD-P n = 160 (86Mo/74Fa)                            | DS-P n = 42 (23Mo/19Fa)                             | ASD-P > DS-P**                                | ASD-P vs. DS-P 0.51                                                                                                                                      |
|                                         |                        |                         | UK                      | Happé et al (2001) [64]    | ASD-P n = 43 (21Mo/22Fa)                             | DLX-P n = 30 (15Mo/15Fa)<br>TD-P n = 20 (10Mo/10Fa) | n.s.                                          | ASD-Mo vs. DLX-Mo 0.05<br>ASD-Mo vs. TD-Mo 0.17<br>ASD-Fa vs. DLX-Fa 0.26<br>ASD-Fa vs. TD-Fa 0.19                                                       |
|                                         |                        |                         | USA                     | Lindgren et al (2009) [47] | ALN-P n = 39 (20Mo/19Fa)<br>ALI-P n = 62 (31Mo/31Fa) | SLI-P n = 70 (35Mo/35Fa)                            | n.s.                                          | ALN-Fa vs. ALI-Fa 0.95<br>ALN-Fa vs. SLI-Fa 2.10<br>ALI-Fa vs. SLI-Fa 0.95<br>ALN-Mo vs. ALI-Mo 0.80<br>ALN-Mo vs. SLI-Mo 2.10<br>ALI-Mo vs. SLI-Mo 1.28 |
|                                         |                        |                         | USA                     | Piven & Palmer (1997) [46] | MPX-P n = 48 (25Mo/23Fa)                             | DS-P n = 60 (30Mo/30Fa)                             | n.s.                                          | MPX-P vs. DS-P 0.16                                                                                                                                      |
|                                         |                        | USA                     | Ruser et al (2007) [37] | ASD-P n = 47 (49% Fa)      | SLI-P n = 47 (45% Fa)<br>DS-P n = 21                 | n.s.                                                | ASD-P vs. SLI-P 0.09<br>ASD-P vs. DS-P 0.26   |                                                                                                                                                          |

|               |           |                                                                             |                           |                                                   |                 |                                                      |
|---------------|-----------|-----------------------------------------------------------------------------|---------------------------|---------------------------------------------------|-----------------|------------------------------------------------------|
|               |           |                                                                             |                           | (48% Fa)                                          |                 |                                                      |
|               | USA       | Schmidt et al (2008) [10]                                                   | ASD-P n = 22 (14Mo/8Fa)   | UA n = 22 (14F/8M)                                | n.s.            | ASD-P vs. UA 0.07                                    |
|               | Australia | Wong et al (2006) [62]                                                      | ASD-P n = 145 (80Mo/65Fa) | TD-P n = 96 (57Mo/39Fa)                           | n.s.            |                                                      |
| Digit Span    | UK        | Fombonne et al (1997) [44]                                                  | ASD-P n = 160 (86Mo/74Fa) | DS-P n = 42 (23Mo/19Fa)                           | ASD-P > DS-P**  | ASD-P vs. DS-P 0.48                                  |
|               | UK        | Whitehouse et al (2007) [23] (modified version to assess short-term memory) | ASD-P n = 30 (20Mo/10Fa)  | SLI-P n = 30 (22Mo/8Fa)<br>TD-P n = 30 (23Mo/7Fa) | ASD-P > SLI-P** | ASD-P vs. SLI-P 0.67<br>ASD-P vs. TD-P 0.14          |
|               | Canada    | Szatmari et al (1993) [76]                                                  | ASD-P n = 97 (51Mo/46Fa)  | DS/LBW-P n = 54 (30Mo/24Fa)                       | n.s.            | ASD-Fa vs. DS/LBW-P 0.40<br>ASD-M0 vs. DS/LBW-P 0.04 |
| Arithmetic    | UK        | Fombonne et al (1997) [44]                                                  | ASD-P n = 160 (86Mo/74Fa) | DS-P n = 42 (23Mo/19Fa)                           | n.s.            | ASD-P vs. DS-P 0.25                                  |
| Vocabulary    | UK        | Fombonne et al (1997) [44]                                                  | ASD-P n = 160 (86Mo/74Fa) | DS-P n = 42 (23Mo/19Fa)                           | ASD-P > DS-P*** | ASD-P vs. DS-P 0.58                                  |
|               | USA       | Schmidt et al (2008) [10]                                                   | ASD-P n = 22 (14Mo/8Fa)   | UA n = 22 (14F/8M)                                | n.s.            | ASD-P vs. UA 0.24                                    |
|               | USA       | Smalley & Asarnow (1990) [45]                                               | ASD-P n = 15              | TD-P n = 12                                       | ASD-P < TD-P*   | ASD-P vs. TD-P 0.96                                  |
|               | Canada    | Szatmari et al (1993) [76]                                                  | ASD-P n = 97 (51Mo/46Fa)  | DS/LBW-P n = 54 (30Mo/24Fa)                       | n.s.            | ASD-Fa vs. DS/LBW-P 0.40<br>ASD-M0 vs. DS/LBW-P 0.04 |
| Comprehension | UK        | Fombonne et al (1997) [44]                                                  | ASD-P n = 160 (86Mo/74Fa) | DS-P n = 42 (23Mo/19Fa)                           | ASD-P > DS-P*   | ASD-P vs. DS-P 0.35                                  |
|               | USA       | Smalley & Asarnow (1990) [45]                                               | ASD-P n = 15              | TD-P n = 12                                       | n.s.            | ASD-P vs. TD-P 0.74                                  |

|                      |                         |             |                               |                           |                                                     |                                                       |                                                                                                                             |
|----------------------|-------------------------|-------------|-------------------------------|---------------------------|-----------------------------------------------------|-------------------------------------------------------|-----------------------------------------------------------------------------------------------------------------------------|
|                      |                         | Canada      | Szatmari et al (1993) [76]    | ASD-P n = 97 (51Mo/46Fa)  | DS/LBW-P n = 54 (30Mo/24Fa)                         | n.s.                                                  | <b>ASD-Fa vs. DS/LBW-P 0.36</b><br><b>ASD-M0 vs. DS/LBW-P 0.31</b>                                                          |
|                      |                         | Iran        | Tajmiriyahi et al (2013) [58] | ASD-P n = 48 (38Mo/10Fa)  | DS-P n = 31 (25Mo/6Fa)<br>TD-P n = 30 (23Mo/7Fa)    | n.s.                                                  | <b>ASD-P vs. DS-P 0.42</b><br><b>ASD-P vs. TD-P 0.39</b>                                                                    |
|                      | Similarities            | UK          | Fombonne et al (1997) [44]    | ASD-P n = 160 (86Mo/74Fa) | DS-P n = 42 (23Mo/19Fa)                             | <b>ASD-P &gt; DS-P*</b>                               | <b>ASD-P vs. DS-P 0.35</b>                                                                                                  |
|                      |                         | USA         | Schmidt et al (2008) [10]     | ASD-P n = 22 (14Mo/8Fa)   | UA n = 22 (14F/8M)                                  | n.s.                                                  | <b>ASD-P vs. UA 0.13</b>                                                                                                    |
| Performance IQ (PIQ) | Total Score or Estimate | Australia   | Bishop et al (2004a) [20]     | ASD-P n = 121 (69Mo/52Fa) | N-P n = 89 (52Mo/37Fa)                              | n.s.                                                  | <b>ASD-Mo vs. N-Mo 0.10</b><br><b>ASD-Fa vs. N-Fa 0.17</b>                                                                  |
|                      |                         | Australia   | Bishop et al (2004b) [53]     | ASD-P = 142 (77Mo/65Fa)   | N-P n = 96 (57Mo/39Fa)                              | n.s.                                                  | <b>ASD-Mo vs. N-Mo 0.03</b><br><b>ASD-Fa vs. N-Fa 0.38</b>                                                                  |
|                      |                         | Netherlands | de Jonge et al (2006) [65]    | MPX-P n=51 (26Mo/25Fa)    | DS-P n = 54 (28Fa/26Mo)                             | n.s.                                                  | <b>MPX-P vs. DS-P 0.03</b>                                                                                                  |
|                      |                         | Netherlands | de Jonge et al (2007) [67]    | MPX-P n = 51 (26Mo/25Fa)  | DS-P n = 52 (25Fa/27Mo)                             | n.s.                                                  | <b>MPX-P vs. DS-P 0.11</b>                                                                                                  |
|                      |                         | Netherlands | de Jonge et al (2009) [66]    | MPX-P n = 51 (26Mo/25Fa)  | DS-P n = 57 (28Mo/29Fa)                             | n.s.                                                  | <b>MPX-P vs. DS-P 0.05</b>                                                                                                  |
|                      |                         | USA         | Folstein et al (1999) [30]    | ASD-P n = 166             | DS-P n = 75                                         | <b>ASD-P &lt; DS-P**</b><br><b>ASD-Fa &lt; DS-Fa*</b> | <b>ASD-P vs. DS-P 0.35</b>                                                                                                  |
|                      |                         | UK          | Fombonne et al (1997) [44]    | ASD-P n = 160 (86Mo/74Fa) | DS-P n = 42 (23Mo/19Fa)                             | n.s.                                                  | <b>ASD-P vs. DS-P 0.13</b>                                                                                                  |
|                      |                         | UK          | Happé et al (2001) [64]       | ASD-P n = 43 (21Mo/22Fa)  | DLX-P n = 30 (15Mo/15Fa)<br>TD-P n = 20 (10Mo/10Fa) | n.s.                                                  | <b>ASD-Mo vs. DLX-Mo 0.09</b><br><b>ASD-Mo vs. TD-Mo 0.26</b><br><b>ASD-Fa vs. DLX-Fa 0.14</b><br><b>ASD-Fa vs. TD-Fa 0</b> |

|                     |           |                                |                                                      |                                                  |                                         |                                                                                                                                                                                                    |
|---------------------|-----------|--------------------------------|------------------------------------------------------|--------------------------------------------------|-----------------------------------------|----------------------------------------------------------------------------------------------------------------------------------------------------------------------------------------------------|
|                     | USA       | Lindgren et al (2009) [47]     | ALN-P n = 39 (20Mo/19Fa)<br>ALI-P n = 62 (31Mo/31Fa) | SLI-P n = 70 (35Mo/35Fa)                         | <b>ALN-Fa &gt; ALI-Fa &gt; SLI-Fa**</b> | <b>ALN-Fa vs. ALI-Fa 0.44</b><br><b>ALI-Fa vs. SLI-Fa 1.16</b><br><b>ALI-Fa vs. SLI-Fa 0.72</b><br><b>ALN-Mo vs. ALI-Mo 0.37</b><br><b>ALN-Mo vs. SLI-Mo 0.77</b><br><b>ALI-Mo vs. SLI-Mo 0.40</b> |
|                     | USA       | Piven & Palmer (1997) [46]     | MPX-P n= 48 (25Mo/23Fa)                              | DS-P n = 60 (30Mo/30Fa)                          | <b>MPX-P &lt; DS-P*</b>                 | <b>MPX-P vs. DS-P 0.74</b>                                                                                                                                                                         |
|                     | USA       | Ruser et al (2007) [37]        | ASD-P n= 47 (49% Fa)                                 | SLI-P n= 47 (45% Fa)<br>DS-P n = 21 (48% Fa)     | <b>n.s.</b>                             | <b>ASD-P vs. SLI-P 0.14</b><br><b>ASD-P vs. DS-P 0.48</b>                                                                                                                                          |
|                     | USA       | Schmidt et al (2008) [10]      | ASD-P n = 22 (14Mo/8Fa)                              | UA n = 22 (14F/8M)                               | <b>ASD-P &lt; UA*</b>                   | <b>ASD-P vs. UA 0.62</b>                                                                                                                                                                           |
|                     | Australia | Wong et al (2006) [62]         | ASD n = 145 (80Mo/65Fa)                              | TD-P n = 96 (57Mo/39Fa)                          | <b>n.s.</b>                             |                                                                                                                                                                                                    |
| Picture Completion  | USA       | Folstein et al (1999) [30]     | ASD-P n = 166                                        | DS-P n = 75                                      | <b>ASD-P &lt; DS-P**</b>                | <b>ASD-P vs. DS-P 0.42</b>                                                                                                                                                                         |
|                     | UK        | Fombonne et al (1997) [44]     | ASD-P n = 160 (86Mo/74Fa)                            | DS-P n = 42 (23Mo/19Fa)                          | <b>n.s.</b>                             | <b>ASD-P vs. DS-P 0.07</b>                                                                                                                                                                         |
|                     | USA       | Piven & Palmer (1997) [46]     | MPX-P n= 48 (25Mo/23Fa)                              | DS-P n = 60 (30Mo/30Fa)                          | <b>MPX-P &lt; DS-P*</b>                 | <b>MPX-P vs. DS-P 0.65</b>                                                                                                                                                                         |
|                     | Iran      | Tajmirriyahi et al (2013) [58] | ASD-P n = 48 (38Mo/10Fa)                             | DS-P n = 31 (25Mo/6Fa)<br>TD-P n = 30 (23Mo/7Fa) | <b>n.s.</b>                             | <b>ASD-P vs. DS-P 0.12</b><br><b>ASD-P vs. TD-P 0.46</b>                                                                                                                                           |
| Picture Arrangement | USA       | Folstein et al (1999) [30]     | ASD-P n = 166                                        | DS-P n = 75                                      | <b>ASD-P &lt; DS-P*</b>                 | <b>ASD-P vs. DS-P 0.26</b>                                                                                                                                                                         |
|                     | UK        | Fombonne et al (1997) [44]     | ASD-P n = 160 (86Mo/74Fa)                            | DS-P n = 42 (23Mo/19Fa)                          | <b>n.s.</b>                             | <b>ASD-P vs. DS-P 0.03</b>                                                                                                                                                                         |



|                      |                         |             |                               |                                                                                 |                             |               |                                                      |
|----------------------|-------------------------|-------------|-------------------------------|---------------------------------------------------------------------------------|-----------------------------|---------------|------------------------------------------------------|
|                      | Block Design            | UK          | Fombonne et al (1997) [44]    | ASD-P n = 160 (86Mo/74Fa)                                                       | DS-P n = 42 (23Mo/19Fa)     | n.s.          | ASD-P vs. DS-P 0.21                                  |
|                      |                         | USA         | Piven & Palmer (1997) [46]    | MPX-P n= 48 (25Mo/23Fa)                                                         | DS-P n = 60 (30Mo/30Fa)     | n.s.          | MPX-P vs. DS-P 0.34                                  |
|                      |                         | USA         | Schmidt et al (2008) [10]     | ASD-P n = 22 (14Mo/8Fa)                                                         | UA n = 22 (14F/8M)          | n.s.          | ASD-P vs. UA 0.43                                    |
|                      |                         | USA         | Smalley & Asarnow (1990) [45] | ASD-P n = 15                                                                    | TD-P n = 12                 | n.s.          | ASD-P vs. TD-P 0.36                                  |
|                      |                         | Canada      | Szatmari et al (1993) [76]    | ASD-P n = 97 (51Mo/46Fa)                                                        | DS/LBW-P n = 54 (30Mo/24Fa) | n.s.          | ASD-Fa vs. DS/LBW-P 0.38<br>ASD-M0 vs. DS/LBW-P 0.04 |
|                      | Object Assembly         | UK          | Fombonne et al (1997) [44]    | ASD-P n = 160 (86Mo/74Fa)                                                       | DS-P n = 42 (23Mo/19Fa)     | n.s.          | ASD-P vs. DS-P 0.12                                  |
|                      |                         | USA         | Piven & Palmer (1997) [46]    | MPX-P n= 48 (25Mo/23Fa)                                                         | DS-P n = 60 (30Mo/30Fa)     | MPX-P < DS-P* | MPX-P vs. DS-P 0.62                                  |
|                      | Matrix Reasoning        | USA         | Schmidt et al (2008) [10]     | ASD-P n = 22 (14Mo/8Fa)                                                         | UA n = 22 (14F/8M)          | ASD-P < UA*   | ASD-P vs. UA 0.67                                    |
|                      | Digit Symbol            | Canada      | Szatmari et al (1993) [76]    | ASD-P n = 97 (51Mo/46Fa)                                                        | DS/LBW-P n = 54 (30Mo/24Fa) | n.s.          | ASD-Fa vs. DS/LBW-P 0.19<br>ASD-M0 vs. DS/LBW-P 0.17 |
| Full Scale IQ (FSIQ) | Total Score or Estimate | USA         | Adolphs et al (2008) [59]     | AD-P n = 42 total<br>BAP(+) Aloof n = 15 (3Mo/12Fa)<br>BAP(-) n = 27 (20Mo/7Fa) | TD-P n = 20 (8Mo/12Fa)      | n.s.          | BAP (+) Aloof vs. TD-P 0.47<br>BAP(-) vs. TD-P 0.37  |
|                      |                         | Netherlands | de Jonge et al (2006) [65]    | MPX-P n=51 (26Mo/25Fa)                                                          | DS-P n = 54 (28Fa/26Mo)     | n.s.          | MPX-P vs. DS-P 0.09                                  |
|                      |                         | Netherlands | de Jonge et al (2007) [67]    | MPX-P n = 51 (26Mo/25Fa)                                                        | DS-P n = 52 (25Fa/27Mo)     | n.s.          | MPX-P vs. DS-P 0.10                                  |
|                      |                         | Netherlands | de Jonge et al (2009) [66]    | MPX-P n = 51 (26Mo/25Fa)                                                        | DS-P n = 57 (28Mo/29Fa)     | n.s.          | MPX-P vs. DS-P 0.06                                  |

|        |                            |                                                                                                                                                                |                                                           |                                                       |                                                                                                                                                                                                    |
|--------|----------------------------|----------------------------------------------------------------------------------------------------------------------------------------------------------------|-----------------------------------------------------------|-------------------------------------------------------|----------------------------------------------------------------------------------------------------------------------------------------------------------------------------------------------------|
| USA    | Folstein et al (1999) [30] | ASD-P n = 166                                                                                                                                                  | DS-P n = 75                                               | <b>ASD-P &lt; DS-P**</b><br><b>ASD-Fa &lt; DS-Fa*</b> | <b>ASD-P vs. DS-P 0.30</b>                                                                                                                                                                         |
| UK     | Fombonne et al (1997) [44] | ASD-P n = 160<br>(86Mo/74Fa)                                                                                                                                   | DS-P n = 42<br>(23Mo/19Fa)                                | n.s.                                                  | <b>ASD-P vs. DS-P 0.25</b>                                                                                                                                                                         |
| Turkey | Gocken et al (2009) [57]   | ASD-P n = 76<br>(38Mo/38Fa)                                                                                                                                    | N-P n = 41<br>(21Mo/20Fa)                                 | n.s.                                                  | <b>ASD-P vs. N-P 0.09</b>                                                                                                                                                                          |
| UK     | Happé et al (2001) [64]    | ASD-P n = 43<br>(21Mo/22)                                                                                                                                      | DLX-P n = 30<br>(15Mo/15Fa)<br>TD-P n = 20<br>(10Mo/10Fa) | n.s.                                                  | <b>ASD-Mo vs. DLX-Mo 0.05</b><br><b>ASD-Mo vs. TD-Mo 0.21</b><br><b>ASD-Fa vs. DLX-Fa 0.28</b><br><b>ASD-Fa vs. TD-Fa 0.11</b>                                                                     |
| USA    | Lindgren et al (2009) [47] | ALN-P n = 39<br>(20Mo/19Fa)<br>ALI-P n = 62<br>(31Mo/31Fa)                                                                                                     | SLI-P n = 70<br>(35Mo/35Fa)                               | n.s.                                                  | <b>ALN-Fa vs. ALI-Fa 0.81</b><br><b>ALN-Fa vs. SLI-Fa 1.88</b><br><b>ALI-Fa vs. SLI-Fa 0.97</b><br><b>ALN-Mo vs. ALI-Mo 0.66</b><br><b>ALN-Mo vs. SLI-Mo 1.61</b><br><b>ALI-Mo vs. SLI-Mo 0.94</b> |
| USA    | Losh & Piven (2007) [48]   | ASD-P n = 48<br>(25Mo/23Fa)<br>BAP(+) <i>Aloof</i> n = 13<br>BAP(+) <i>Rigid</i> n = 11<br>BAP(-) n = 24                                                       | TD/DS-P n = 22<br>TD-P n = 16<br>DS-P n = 6               | <b>ASD-P &lt; TD/DS-P**</b>                           | <b>ASD-P vs. TD/DS-P 0.83</b>                                                                                                                                                                      |
| USA    | Losh et al (2008) [34]     | MPX n=48<br>(25Mo/23Fa)<br>SPX n=78                                                                                                                            | DS-P n=60                                                 | <b>MPX-P &lt; DS-P*</b><br><b>SPX-P &lt; DS-P*</b>    |                                                                                                                                                                                                    |
| USA    | Losh et al (2009) [56]     | ASD-P n= 83<br>BAP(+) <i>Social</i> n = 22<br>BAP(+) <i>Rigid/Perfectionistic</i> n = 34<br>BAP(+) <i>Social &amp; Rigid</i> n = 13 (5Mo/8Fa)<br>BAP(-) n = 40 | TD-P n = 32<br>(19Mo/13Fa)                                | n.s.                                                  | <b>ASD-P vs. TD-P 0.33</b>                                                                                                                                                                         |
| USA    | Piven et al (1991) [68]    | ASD-P n = 81<br>(42Mo/39Fa)                                                                                                                                    | DS-P n = 34<br>(18Mo/16Fa)                                | n.s.                                                  | <b>ASD-P vs. DS-P 0.21</b>                                                                                                                                                                         |
| USA    | Schmidt et al              | ASD-P n = 22                                                                                                                                                   | UA n = 22                                                 | n.s.                                                  | <b>ASD-P vs. UA 0.41</b>                                                                                                                                                                           |

|                                      |                                            |                                 |                                 |                              |                                                               |                                                                                   |                                          |                                                                                                                                                                                                                        |
|--------------------------------------|--------------------------------------------|---------------------------------|---------------------------------|------------------------------|---------------------------------------------------------------|-----------------------------------------------------------------------------------|------------------------------------------|------------------------------------------------------------------------------------------------------------------------------------------------------------------------------------------------------------------------|
|                                      |                                            |                                 |                                 | (2008) [10]                  | (14Mo/8Fa)                                                    | (14F/8M)                                                                          |                                          |                                                                                                                                                                                                                        |
|                                      | Nonverbal Reasoning                        | Block Design & Matrix Reasoning | UK                              | Whitehouse et al (2007) [23] | ASD-P n = 30 (20Mo/10Fa)                                      | SLI-P n= 30 (22Mo/8Fa)<br>TD-P n = 30 (23Mo/7Fa)                                  | n.s.                                     | ASD-Fa vs. SLI-Fa <b>0.30</b><br>ASD-Mo vs. SLI-Mo <b>0.43</b><br>ASD-Fa vs. TD-Fa <b>0.01</b><br>ASD-Mo vs. TD-Mo <b>0.53</b>                                                                                         |
|                                      | <b>Raven's Progressive Matrices</b>        | Total Score                     | Germany / Austria / Switzerland | Bölte & Poustka (2003) [49]  | ASD SPX-P n = 54 (26Mo/ 28Fa)<br>ASD MPX-P n = 28 (16Mo/12Fa) | Sch SPX-P n = 31 (18Mo/ 13Fa)<br>Sch MPX-P n = 4 (2Mo/2Fa)<br>UA n = 22 (11F/11M) | n.s.                                     | ASD MPX-P vs. Sch MPX-P <b>0.29</b><br>ASD MPX vs. Sch SPX-P <b>0.07</b><br>ASD MPX-P vs. UA <b>0.08</b><br>ASD SPX-P vs. Sch MPX-P <b>0.28</b><br>ASD SPX-P vs. Sch SPX-P <b>0.05</b><br>ASD SPX-P vs. UA <b>0.07</b> |
|                                      | Nonverbal IQ (NVIQ)                        |                                 | Germany                         | Bölte & Poustka (2006) [50]  | ASD n=62 (33Mo/29Fa)                                          | EOS-P n = 36 (20Mo/16Fa)<br>MR-P n = 30 (16Mo/14Fa)                               | n.s.                                     | ASD-P vs. EOS-P <b>0.54</b><br>ASD-P vs. MR-P <b>0.45</b>                                                                                                                                                              |
|                                      |                                            |                                 | Germany                         | Bölte et al (2007) [51]      | ASD SPX-P n = 87 (48Mo/39Fa)<br>ASD MPX-P n = 38 (21Mo/17Fa)  | OCD-P n = 37 (19Mo/18Fa)<br>EOS-P n = 34 (20Mo/14Fa)<br>MR-P n = 27 (15Mo/12Fa)   | n.s.                                     | MPX-P vs. OCD-P <b>0.13</b><br>MPX-P vs. EOS-P <b>0.52</b><br>MPX-P vs. MR-P <b>0.56</b><br>SPX-P vs. OCD-p <b>0.06</b><br>SPX-P vs. EOS-P <b>0.48</b><br>SPX-P vs. MR-P <b>0.57</b>                                   |
|                                      |                                            |                                 | UK                              | Sucksmith et al (2013) [51]  | ASD-P n = 310 (272Mo/38Fa)                                    | UA n = 187 (93M/94F)                                                              | n.s.                                     | ASD-P vs. UA <b>0.17</b>                                                                                                                                                                                               |
| <b>Structural Language Abilities</b> | Peabody Picture Vocabulary Test (PPVT-III) | Receptive language              | USA                             | Lindgren et al (2009) [47]   | ALN-P n = 39 (20Mo/19Fa)<br>ALI-P n = 62 (31Mo/31Fa)          | SLI-P n = 70 (35Mo/35Fa)                                                          | <b>ALN-Mo &gt; ALI-Mo &gt; SLI-Mo***</b> | ALN-Fa vs. ALI-Fa <b>0.77</b><br>ALN-Fa vs. SLI-Fa <b>1.58</b><br>ALI-Fa vs. SLI-Fa <b>0.74</b><br>ALN-Mo vs. ALI-Mo <b>0.42</b><br>ALN-Mo vs. SLI-Mo <b>1.33</b><br>ALI-Mo vs. SLI-Mo <b>0.87</b>                     |
| <b>Receptive Language</b>            |                                            |                                 | USA                             | Schmidt et al (2008) [10]    | ASD-P n = 22 (14Mo/8Fa)                                       | UA n = 22 (14F/8M)                                                                | n.s.                                     | ASD-P vs. UA <b>0.33</b>                                                                                                                                                                                               |
|                                      | Test for Reception of Grammar-2            | Receptive Grammar               | UK                              | Whitehouse et al (2007) [23] | ASD-P n = 30 (20Mo/10Fa)                                      | SLI-P n= 30 (22Mo/8Fa)<br>TD-P n = 30                                             | n.s.                                     |                                                                                                                                                                                                                        |

|                               |                                                                                     |                        |     |                            |                                                      |                          |                             |                                                                                                                                                          |
|-------------------------------|-------------------------------------------------------------------------------------|------------------------|-----|----------------------------|------------------------------------------------------|--------------------------|-----------------------------|----------------------------------------------------------------------------------------------------------------------------------------------------------|
|                               | (TROG-2)                                                                            |                        |     |                            |                                                      | (23Mo/7Fa)               |                             |                                                                                                                                                          |
| <b>Expressive Language</b>    | Expressive Vocabulary Test (EVT)                                                    | Expressive language    | USA | Schmidt et al (2008) [10]  | ASD-P n = 22 (14Mo/8Fa)                              | UA n = 22 (14F/8M)       | n.s.                        | ASD-P vs. UA 0.10                                                                                                                                        |
|                               | Verbal Fluency Subtest - Delis Kaplan Executive Function System (DK-EFS)            | Letter fluency         | USA | Schmidt et al (2008) [10]  | ASD-P n = 22 (14Mo/8Fa)                              | UA n = 22 (14F/8M)       | n.s.                        | ASD-P vs. UA 0.39                                                                                                                                        |
|                               |                                                                                     | Category fluency       | USA | Schmidt et al (2008) [10]  | ASD-P n = 22 (14Mo/8Fa)                              | UA n = 22 (14F/8M)       | n.s.                        | ASD-P vs. UA 0.35                                                                                                                                        |
|                               |                                                                                     | Category switching     | USA | Schmidt et al (2008) [10]  | ASD-P n = 22 (14Mo/8Fa)                              | UA n = 22 (14F/8M)       | n.s.                        | ASD-P vs. UA 0.16                                                                                                                                        |
|                               |                                                                                     | Switching Accuracy     | USA | Schmidt et al (2008) [10]  | ASD-P n = 22 (14Mo/8Fa)                              | UA n = 22 (14F/8M)       | n.s.                        | ASD-P vs. UA 0.22                                                                                                                                        |
| <b>Figurative Language</b>    | Figurative Language Subtest - Test of Language Competence-Expanded Edition (TOLC-E) | Figurative Language    | USA | Schmidt et al (2008) [10]  | ASD-P n = 22 (14Mo/8Fa)                              | UA n = 22 (14F/8M)       | n.s.                        | ASD-P vs. UA 0.28                                                                                                                                        |
| <b>Phonological awareness</b> | Comprehensive Test of Phonological Processing (CTOPP)                               | Phonological Awareness | USA | Lindgren et al (2009) [47] | ALN-P n = 39 (20Mo/19Fa)<br>ALI-P n = 62 (31Mo/31Fa) | SLI-P n = 70 (35Mo/35Fa) | ALN-Mo > ALI-Mo > SLI-Mo*** | ALN-Fa vs. ALI-Fa 0.42<br>ALN-Fa vs. SLI-Fa 0.86<br>ALI-Fa vs. SLI-Fa 0.38<br>ALN-Mo vs. ALI-Mo 0.38<br>ALN-Mo vs. SLI-Mo 0.78<br>ALI-Mo vs. SLI-Mo 0.48 |
|                               |                                                                                     | Phonological memory    | USA | Lindgren et al (2009) [47] | ALN-P n = 39 (20Mo/19Fa)<br>ALI-P n = 62 (31Mo/31Fa) | SLI-P n = 70 (35Mo/35Fa) | n.s.                        | ALN-Fa vs. ALI-Fa 0.08<br>ALN-Fa vs. SLI-Fa 0.96<br>ALI-Fa vs. SLI-Fa 0.86<br>ALN-Mo vs. ALI-Mo 0.74<br>ALN-Mo vs. SLI-Mo 1.42                           |

|                                                                               |                        |           |                              |                                                      |                                                   |                                          |                                                                                                                                                          |
|-------------------------------------------------------------------------------|------------------------|-----------|------------------------------|------------------------------------------------------|---------------------------------------------------|------------------------------------------|----------------------------------------------------------------------------------------------------------------------------------------------------------|
|                                                                               |                        |           |                              |                                                      |                                                   |                                          | <b>ALI-Mo vs. SLI-Mo 0.70</b>                                                                                                                            |
|                                                                               | Rapid naming           | USA       | Lindgren et al (2009) [47]   | ALN-P n = 39 (20Mo/19Fa)<br>ALI-P n = 62 (31Mo/31Fa) | SLI-P n = 70 (35Mo/35Fa)                          | n.s.                                     | ALN-Fa vs. ALI-Fa 0.02<br>ALN-Fa vs. SLI-Fa 0.34<br>ALI-Fa vs. SLI-Fa 0.36<br>ALN-Mo vs. ALI-Mo 0.09<br>ALN-Mo vs. SLI-Mo 0.47<br>ALI-Mo vs. SLI-Mo 0.41 |
|                                                                               | Non-word repetition    | USA       | Lindgren et al (2009) [47]   | ALN-P n = 39 (20Mo/19Fa)<br>ALI-P n = 62 (31Mo/31Fa) | SLI-P n = 70 (35Mo/35Fa)                          | <b>ALN-Mo &gt; ALI-Mo &gt; SLI-Mo***</b> | ALN-Fa vs. ALI-Fa 0.28<br>ALN-Fa vs. SLI-Fa 1.04<br>ALI-Fa vs. SLI-Fa 0.59<br>ALN-Mo vs. ALI-Mo 0.51<br>ALN-Mo vs. SLI-Mo 1.28<br>ALI-Mo vs. SLI-Mo 0.83 |
|                                                                               |                        | USA       | Schmidt et al (2008) [10]    | ASD-P n = 22 (14Mo/8Fa)                              | UA n = 22 (14F/8M)                                | <b>ASD-P &lt; UA**</b>                   | <b>ASD-P vs. UA 0.87</b>                                                                                                                                 |
| Nonword Memory Test                                                           | Raw score              | Australia | Bishop et al (2004b) [53]    | ASD-P = 142 (77Mo/65Fa)                              | N-P n = 96 (57Mo/39Fa)                            | n.s.                                     | ASD-Fa vs. N-Fa 0.04<br>ASD-Mo vs. N-Mo 0.02                                                                                                             |
| Nonsense Passage Reading Test                                                 | Total score            | Australia | Bishop et al (2004b) [53]    | ASD-P = 145 (80Mo/65Fa)                              | N-P n = 96 (57Mo/39Fa)                            | n.s.                                     | ASD-Fa vs. N-Fa 0.04<br>ASD-Mo vs. N-Mo 0.42                                                                                                             |
| Nepsy Test Battery - Repetition of Nonsense Words Subtest                     | Raw score              | UK        | Whitehouse et al (2007) [23] | ASD-P n = 30 (20Mo/10Fa)                             | SLI-P n = 30 (22Mo/8Fa)<br>TD-P n = 30 (23Mo/7Fa) | <b>ASD-P &gt; SLI-P**</b>                | ASD-P vs. SLI-P 0.88<br>ASD-P vs. TD-P 0.04                                                                                                              |
| Battery of verbal tasks (emphasis on orthographic and phonological abilities) | Composite Verbal Score | France    | Plumet et al (1995) [54]     | ASD-P n = 47 (25Mo/22Fa)                             | DS-P n = 44 (23Mo/21Fa)                           | n.s.                                     | <b>ASD-P vs. DS-P 0.22</b>                                                                                                                               |

| <b>Reading Skills</b>                                        | Rapid Automized Naming (RAN)          |     |                            |                                                      |                          |                                          |                                                                                                                                                                                                    |
|--------------------------------------------------------------|---------------------------------------|-----|----------------------------|------------------------------------------------------|--------------------------|------------------------------------------|----------------------------------------------------------------------------------------------------------------------------------------------------------------------------------------------------|
| <i>Number</i>                                                | Time to complete                      | USA | Piven & Palmer (1997) [46] | MPX-P n = 48 (25Mo/23Fa)                             | DS-P n = 60 (30Mo/30Fa)  | n.s.                                     | <b>MPX-P vs. DS-P 0.19</b>                                                                                                                                                                         |
| <i>Letter</i>                                                | Time to complete                      | USA | Piven & Palmer (1997) [46] | MPX-P n = 48 (25Mo/23Fa)                             | DS-P n = 60 (30Mo/30Fa)  | n.s.                                     | <b>MPX-P vs. DS-P 0.17</b>                                                                                                                                                                         |
| <i>Colour</i>                                                | Time to complete                      | USA | Piven & Palmer (1997) [46] | MPX-P n = 48 (25Mo/23Fa)                             | DS-P n = 60 (30Mo/30Fa)  | <b>MPX-P &gt; DS-P*</b>                  | <b>MPX-P vs. DS-P 0.72</b>                                                                                                                                                                         |
| <i>Object</i>                                                | Time to complete                      | USA | Piven & Palmer (1997) [46] | MPX-P n = 48 (25Mo/23Fa)                             | DS-P n = 60 (30Mo/30Fa)  | <b>MPX-P &gt; DS-P*</b>                  | <b>MPX-P vs. DS-P 0.58</b>                                                                                                                                                                         |
| <i>Color/Object combined</i>                                 | Time to complete                      | USA | Losh et al (2010) [55]     | ASD-P n = 301                                        | TD-P/DS-P n = 87         | <b>ASD-P &gt; TD-P/DS-P**</b>            |                                                                                                                                                                                                    |
| Woodcock-Johnson Psycho-Educational Battery - Revised (WJ-R) | Broad reading composite               | USA | Lindgren et al (2009) [47] | ALN-P n = 39 (20Mo/19Fa)<br>ALI-P n = 62 (31Mo/31Fa) | SLI-P n = 70 (35Mo/35Fa) | n.s.                                     | <b>ALN-Fa vs. ALI-Fa 0.78</b><br><b>ALN-Fa vs. SLI-Fa 2.11</b><br><b>ALI-Fa vs. SLI-Fa 1.06</b><br><b>ALN-Mo vs. ALI-Mo 0.48</b><br><b>ALN-Mo vs. SLI-Mo 1.69</b><br><b>ALI-Mo vs. SLI-Mo 1.26</b> |
|                                                              | Reading skill composite               | USA | Lindgren et al (2009) [47] | ALN-P n = 39 (20Mo/19Fa)<br>ALI-P n = 62 (31Mo/31Fa) | SLI-P n = 70 (35Mo/35Fa) | n.s.                                     | <b>ALN-Fa vs. ALI-Fa 0.69</b><br><b>ALN-Fa vs. SLI-Fa 1.84</b><br><b>ALI-Fa vs. SLI-Fa 1.00</b><br><b>ALN-Mo vs. ALI-Mo 0.40</b><br><b>ALN-Mo vs. SLI-Mo 1.67</b><br><b>ALI-Mo vs. SLI-Mo 1.24</b> |
|                                                              | Nonsense Word Reading – Reading age   | USA | Folstein et al (1999) [30] | ASD-P n = 166                                        | DS-P n = 75              | <b>ASD-P &lt; DS-P*</b>                  | <b>ASD-P vs. DS-P 0.48</b>                                                                                                                                                                         |
|                                                              | Nonsense Word Reading – Reading grade | USA | Folstein et al (1999) [30] | ASD-P n = 166                                        | DS-P n = 75              | <b>ASD-P &lt; DS-P*</b>                  | <b>ASD-P vs. DS-P 0.40</b>                                                                                                                                                                         |
|                                                              | Dictation                             | USA | Lindgren et al (2009) [47] | ALN-P n = 39 (20Mo/19Fa)<br>ALI-P n = 62 (31Mo/31Fa) | SLI-P n = 70 (35Mo/35Fa) | <b>ALN-Mo &gt; ALI-Mo &gt; SLI-Mo***</b> | <b>ALN-Fa vs. ALI-Fa 0.66</b><br><b>ALN-Fa vs. SLI-Fa 1.65</b><br><b>ALI-Fa vs. SLI-Fa 0.87</b><br><b>ALN-Mo vs. ALI-Mo 0.36</b>                                                                   |

|  |                               |     |                            |                                                      |                          |                           |                                                                                                                                                          |
|--|-------------------------------|-----|----------------------------|------------------------------------------------------|--------------------------|---------------------------|----------------------------------------------------------------------------------------------------------------------------------------------------------|
|  |                               |     |                            |                                                      |                          |                           | ALN-Mo vs. SLI-Mo 1.26<br>ALI-Mo vs. SLI-Mo 0.99                                                                                                         |
|  |                               | USA | Piven & Palmer (1997) [46] | MPX-P n= 48 (25Mo/23Fa)                              | DS-P n = 60 (30Mo/30Fa)  | n.s.                      | MPX-P vs. DS-P 0.17                                                                                                                                      |
|  | Passage comprehension         | USA | Lindgren et al (2009) [47] | ALN-P n = 39 (20Mo/19Fa)<br>ALI-P n = 62 (31Mo/31Fa) | SLI-P n = 70 (35Mo/35Fa) | ALN-Mo > ALI-Mo > SLI-Mo* | ALN-Fa vs. ALI-Fa 0.59<br>ALN-Fa vs. SLI-Fa 1.54<br>ALI-Fa vs. SLI-Fa 0.79<br>ALN-Mo vs. ALI-Mo 0.50<br>ALN-Mo vs. SLI-Mo 1.46<br>ALI-Mo vs. SLI-Mo 1.01 |
|  |                               | USA | Piven & Palmer (1997) [46] | MPX-P n= 48 (25Mo/23Fa)                              | DS-P n = 60 (30Mo/30Fa)  | MPX-P < DS-P*             | MPX-P vs. DS-P 0.45                                                                                                                                      |
|  | Word Attack                   | USA | Lindgren et al (2009) [47] | ALN-P n = 39 (20Mo/19Fa)<br>ALI-P n = 62 (31Mo/31Fa) | SLI-P n = 70 (35Mo/35Fa) | n.s.                      | ALN-Fa vs. ALI-Fa 0.48<br>ALN-Fa vs. SLI-Fa 1.30<br>ALI-Fa vs. SLI-Fa 0.75<br>ALN-Mo vs. ALI-Mo 0.31<br>ALN-Mo vs. SLI-Mo 1.35<br>ALI-Mo vs. SLI-Mo 1.06 |
|  |                               | USA | Piven & Palmer (1997) [47] | MPX-P n= 48 (25Mo/23Fa)                              | DS-P n = 60 (30Mo/30Fa)  | n.s.                      | MPX-P vs. DS-P 0.09                                                                                                                                      |
|  | Letter Word                   | USA | Piven & Palmer (1997) [46] | MPX-P n= 48 (25Mo/23Fa)                              | DS n = 60 (30Mo/30Fa)    | n.s.                      | MPX-P vs. DS-P 0.24                                                                                                                                      |
|  | Gray Oral Reading Test (GORT) | USA | Folstein et al (1999) [30] | ASD-P n = 166                                        | DS-P n = 75              | n.s.                      | ASD-P vs. DS-P 0.12                                                                                                                                      |
|  | Passage                       | USA | Folstein et al (1999) [30] | ASD-P n = 166                                        | DS-P n = 75              | n.s.                      | ASD-P vs. DS-P 0.21                                                                                                                                      |
|  | Reading age                   | UK  | Fombonne et al (1997) [44] | ASD-P n = 160 (86Mo/74Fa)                            | DS-P n = 42 (23Mo/19Fa)  | n.s.                      | ASD-P vs. DS-P 0.36                                                                                                                                      |
|  | Edinburgh Reading Test (ERT)  | UK  | Fombonne et al (1997) [44] | ASD-P n = 160 (86Mo/74Fa)                            | DS-P n = 42 (23Mo/19Fa)  | n.s.                      | ASD-P vs. DS-P 0                                                                                                                                         |
|  | National Adult                | UK  | Baron-Cohen &              | AS-P n = 30                                          | TD-P n = 30              | n.s.                      | ASD-P vs. N-P 0.20                                                                                                                                       |

**Spelling abilities**

|                                                       |                      |     |                              |                           |                                                  |                          |                                                           |
|-------------------------------------------------------|----------------------|-----|------------------------------|---------------------------|--------------------------------------------------|--------------------------|-----------------------------------------------------------|
| Reading Test (NART)                                   |                      |     | Hammer (1997) [7]            | (15Mo/15Fa)               | (15Mo/15Fa)                                      |                          |                                                           |
|                                                       |                      | UK  | Fombonne et al (1997) [44]   | ASD-P n = 160 (86Mo/74Fa) | DS-P n = 42 (23Mo/19Fa)                          | <b>ASD-P &lt; DS-P*</b>  | <b>ASD-P vs. DS-P 0.44</b>                                |
| Test of Word Reading Efficiency                       |                      |     |                              |                           |                                                  |                          |                                                           |
| Sight Word Efficiency Subtest (real words)            | Standard score       | UK  | Whitehouse et al (2007) [23] | ASD-P n = 30 (20Mo/10Fa)  | SLI-P n= 30 (22Mo/8Fa)<br>TD-P n = 30 (23Mo/7Fa) | <b>n.s.</b>              | <b>ASD-P vs. SLI-P 0.18</b><br><b>ASD-P vs. TD-P 0.03</b> |
| Phonemic Decoding Efficiency Subtest (nonsense words) | Standard score       | UK  | Whitehouse et al (2007) [23] | ASD-P n = 30 (20Mo/10Fa)  | SLI-P n= 30 (22Mo/8Fa)<br>TD-P n = 30 (23Mo/7Fa) | <b>ASD-P &gt; SLI-P*</b> | <b>ASD-P vs. SLI-P 0.62</b><br><b>ASD-P vs. TD-P 0.24</b> |
| Reading History Questionnaire (RHQ)                   | Reading difficulties | USA | Schmidt et al (2008) [10]    | ASD-P n = 22 (14Mo/8Fa)   | UA n = 22 (14F/8M)                               | <b>n.s.</b>              | <b>ASD-P vs. UA 0.34</b>                                  |
| Schonell Spelling Test (SST)                          | Total words correct  | USA | Folstein et al (1999) [30]   | ASD-P n = 166             | DS-P n = 75                                      | <b>n.s.</b>              | <b>ASD-P vs. DS-P 0.13</b>                                |
|                                                       |                      | UK  | Fombonne et al (1997) [44]   | ASD-P n = 160 (86Mo/74Fa) | DS-P n = 42 (23Mo/19Fa)                          | <b>ASD-P &gt; DS-P**</b> | <b>ASD-P vs. DS-P 0.62</b>                                |
|                                                       | Spelling age         | USA | Folstein et al (1999) [30]   | ASD-P n = 166             | DS-P n = 75                                      | <b>n.s.</b>              | <b>ASD-P vs. DS-P 0.02</b>                                |
| Speeded Dictation task                                | Raw Score            | UK  | Whitehouse et al (2007) [23] | ASD-P n = 30 (20Mo/10Fa)  | SLI-P n= 30 (22Mo/8Fa)<br>TD-P n = 30 (23Mo/7Fa) | <b>n.s.</b>              |                                                           |



|                             |                                                  |                               |          |                                |                                                                                                                                        |                                                  |                                                                                                     |                                                                                                                              |
|-----------------------------|--------------------------------------------------|-------------------------------|----------|--------------------------------|----------------------------------------------------------------------------------------------------------------------------------------|--------------------------------------------------|-----------------------------------------------------------------------------------------------------|------------------------------------------------------------------------------------------------------------------------------|
| <b>Oromotor Functioning</b> | Oromotor Sequencing Subtest - NEPSY Test Battery | Raw score                     | UK       | Whitehouse et al (2007) [23]   | ASD-P n = 30 (20Mo/10Fa)                                                                                                               | SLI-P n= 30 (22Mo/8Fa)<br>TD-P n = 30 (23Mo/7Fa) | <b>ASD-P &gt; SLI-P**</b>                                                                           | <b>ASD-P vs. SLI-P 0.54</b><br><b>ASD-P vs. TD-P 0.43</b>                                                                    |
|                             | <b>Social Cognition</b>                          | Reading the Mind in Eyes Test | Accuracy | UK                             | Baron-Cohen & Hammer (1997) [7]                                                                                                        | AS-P n = 30 (15Mo/15Fa)                          | TD-P n = 30 (15Mo/15Fa)                                                                             | <b>ASD-Fa &lt; N-Fa**</b><br><b>ASD-Mo &lt; N-Mo***</b>                                                                      |
| <b>Theory of Mind</b>       |                                                  |                               | USA      | Losh & Piven (2007) [46]       | ASD-P n = 48 (25Mo/23Fa)<br>BAP(+) Aloof n = 13<br>BAP(+) Rigid n = 11<br>BAP(-) n = 24                                                | TD/DS-P n = 22<br>TD-P n = 16<br>DS-P n = 6      | <b>BAP(+) Aloof &lt; TD/DS-P**</b><br><b>BAP(+) Aloof &lt; BAP(-)**</b>                             | <b>BAP (+) Aloof vs. TD/DS-P 1.51</b><br><b>BAP (+) Aloof vs. BAP(-) 1.49</b><br><b>BAP (+) Aloof vs. BAP (+) Rigid 1.48</b> |
|                             |                                                  |                               | USA      | Losh et al (2009) [56]         | ASD-P n = 83<br>BAP(+) Social n = 22<br>BAP(+) Rigid/Perfectionistic n = 34<br>BAP(+) Social & Rigid n = 13 (5Mo/8Fa)<br>BAP(-) n = 40 | TD-P n = 32 (19Mo/13Fa)                          | <b>ASD-P &lt; TD-P*</b><br><b>BAP(+) Social &lt; BAP(-)***</b><br><b>BAP(+) Social &lt; TD-P***</b> |                                                                                                                              |
|                             |                                                  |                               | Turkey   | Gocken et al (2009) [57]       | ASD-P n = 76 (38Mo/38Fa)                                                                                                               | N-P n = 41 (21Mo/20Fa)                           | n.s.                                                                                                | <b>ASD-P vs. N-P 0.43</b>                                                                                                    |
|                             |                                                  |                               | Iran     | Tajmirriyahi et al (2013) [58] | ASD-P n = 48 (38Mo/10Fa)                                                                                                               | DS-P n = 31 (25Mo/6Fa)<br>TD-P n = 30 (23Mo/7Fa) | n.s.                                                                                                | <b>ASD-P vs. DS-P 0.33</b><br><b>ASD-P vs. TD-P 0.03</b>                                                                     |
|                             |                                                  |                               | Iran     | Gocken et al (2009) [57]       | ASD-P n = 76 (38Mo/38Fa)                                                                                                               | N-P n = 41 (21Mo/20Fa)                           | n.s.                                                                                                | <b>ASD-P vs. N-P 0.23</b>                                                                                                    |
|                             | <b>The Faces Test (mental state decoding)</b>    | Accuracy                      | Iran     | Gocken et al (2009) [57]       | ASD-P n = 76 (38Mo/38Fa)                                                                                                               | N-P n = 41 (21Mo/20Fa)                           | n.s.                                                                                                | <b>ASD-P vs. N-P 0.23</b>                                                                                                    |
|                             | <b>Reading the Mind in the Voice Test</b>        | Accuracy                      | Iran     | Tajmirriyahi et al (2013) [58] | ASD-P n = 48 (38Mo/10Fa)                                                                                                               | DS-P n = 31 (25Mo/6Fa)<br>TD-P n = 30 (23Mo/7Fa) | <b>ASD-P &lt; DS-P**, TD-P***</b>                                                                   | <b>ASD-P vs. DS-P 0.63</b><br><b>ASD-P vs. TD-P 0.98</b>                                                                     |

|                                                |                                                                                       |                                                                        |                 |                             |                                                                                 |                         |                                                                                  |                                                            |
|------------------------------------------------|---------------------------------------------------------------------------------------|------------------------------------------------------------------------|-----------------|-----------------------------|---------------------------------------------------------------------------------|-------------------------|----------------------------------------------------------------------------------|------------------------------------------------------------|
|                                                | <b>False belief tasks: 'Smarties task'; Sally-Anne task; Unexpected transfer test</b> | No. of tasks passed                                                    | Italy           | Di Michele et al (2007) [8] | ASD n = 46                                                                      | DS-P n=14<br>TD-P n=12  | <b>ASD-P &lt; TD-P***</b><br><b>ASD-P &lt; DS-P***</b>                           |                                                            |
|                                                | <b>Unexpected Outcomes Test (UOT)</b>                                                 | Total score                                                            | Turkey          | Gocken et al (2009) [57]    | ASD-P n = 76 (38Mo/38Fa)                                                        | N-P n = 41 (21Mo/20Fa)  | <b>ASD-P &lt; N-P**</b>                                                          | <b>ASD-P vs. N-P 0.58</b>                                  |
|                                                | <b>The Hinting Task</b>                                                               | Accuracy                                                               | Turkey          | Gocken et al (2009) [57]    | ASD-P n = 76 (38Mo/38Fa)                                                        | N-P n = 41 (21Mo/20Fa)  | n.s.                                                                             | <b>ASD-P vs. N-P 0.36</b>                                  |
| <b>Empathy</b>                                 | <b>Empathy Quotient (EQ)</b>                                                          | Mean score                                                             | UK              | Sucksmith et al (2013) [52] | ASD-P n = 310 (272Mo/38Fa)                                                      | UA n = 187 (93M/94F)    | <b>ASD-Fa &lt; UA-M*</b>                                                         | <b>ASD-Fa vs. US-M 0.40</b><br><b>ASD-Mo vs. UA-F 0.11</b> |
| <b>Affect Perception / Emotion Recognition</b> | <b>Pictures of Facial affect - 'Bubbles' method</b>                                   | Accuracy                                                               | USA             | Adolphs et al (2008) [59]   | AD-P n = 42 total<br>BAP(+) Aloof n = 15 (3Mo/12Fa)<br>BAP(-) n = 27 (20Mo/7Fa) | TD-P n = 20 (8Mo/12Fa)  | n.s.                                                                             |                                                            |
|                                                |                                                                                       | Reaction Time                                                          | USA             | Adolphs et al (2008) [59]   | AD-P n = 42 total<br>BAP(+) Aloof n = 15 (3Mo/12Fa)<br>BAP(-) n = 27 (20Mo/7Fa) | TD-P n = 20 (8Mo/12Fa)  | n.s.                                                                             |                                                            |
|                                                |                                                                                       | Use of Facial Information<br><i>Eyes region</i><br><i>Mouth region</i> | USA             | Adolphs et al (2008) [59]   | AD-P n = 42 total<br>BAP(+) Aloof n = 15 (3Mo/12Fa)<br>BAP(-) n = 27 (20Mo/7Fa) | TD-P n = 20 (8Mo/12Fa)  | <b>BAP(+) &lt; BAP(-) &lt; TD-P***</b><br><b>BAP(+) &gt; BAP(-) &gt; TD-P***</b> |                                                            |
| <b>Penn Emotion</b>                            | Time for correct                                                                      | Brazil                                                                 | das Neves et al | ASD-P n = 40                | UA n = 41                                                                       | <b>ASD-P &gt; UA***</b> | <b>ASD-P vs. UA 1.09</b>                                                         |                                                            |



|                                                        |                                                        |     |                             |                                                                                                                                                                    |                         |                                                                  |                                                      |
|--------------------------------------------------------|--------------------------------------------------------|-----|-----------------------------|--------------------------------------------------------------------------------------------------------------------------------------------------------------------|-------------------------|------------------------------------------------------------------|------------------------------------------------------|
|                                                        |                                                        |     | (2014) [21]                 | (36Mo/36Fa)                                                                                                                                                        | (19Mo/19Fa)             |                                                                  |                                                      |
| <b>Karolinska Directed Emotional Faces task (KDEF)</b> | Mean accuracy p/emotion                                | UK  | Sucksmith et al (2013) [52] | ASD-P n = 297 (261Mo/36Fa)                                                                                                                                         | UA n = 184 (92M/92F)    | n.s.                                                             | <b>ASD-Fa vs. UA-M 0.12<br/>ASD-Mo vs. UA-F 0.08</b> |
|                                                        | Overall mean accuracy adjusted response time p/emotion | UK  | Sucksmith et al (2013) [52] | ASD-P n = 297 (261Mo/36Fa)                                                                                                                                         | UA n = 184 (92M/92F)    | n.s.                                                             | <b>ASD-Fa vs. UA-M 0.30<br/>ASD-Mo vs. UA-F 0.20</b> |
| <b>Point light basic emotions</b>                      |                                                        |     |                             |                                                                                                                                                                    |                         |                                                                  |                                                      |
| <b>Positive emotions</b>                               | Accuracy                                               | USA | Losh et al (2009) [56]      | ASD-P n = 83<br>BAP(+) <i>Social</i> n = 22<br>BAP(+)<br><i>Rigid/Perfectionistic</i> n = 34<br>BAP(+) <i>Social &amp; Rigid</i> n = 13 (5Mo/8Fa)<br>BAP(-) n = 40 | TD-P n = 32 (19Mo/13Fa) | <b>ASD-P &lt; TD-P**</b>                                         |                                                      |
| <b>Negative emotions</b>                               | Accuracy                                               | USA | Losh et al (2009) [56]      | ASD-P n = 83<br>BAP(+) <i>Social</i> n = 22<br>BAP(+)<br><i>Rigid/Perfectionistic</i> n = 34<br>BAP(+) <i>Social &amp; Rigid</i> n = 13 (5Mo/8Fa)<br>BAP(-) n = 40 | TD-P n = 32 (19Mo/13Fa) | n.s.                                                             |                                                      |
| <b>Point light trustworthiness</b>                     |                                                        |     |                             |                                                                                                                                                                    |                         |                                                                  |                                                      |
| <b>Positive stimuli</b>                                | Accuracy                                               | USA | Losh et al (2009) [56]      | ASD-P n = 83<br>BAP(+) <i>Social</i> n = 22<br>BAP(+)<br><i>Rigid/Perfectionistic</i> n = 34<br>BAP(+) <i>Social &amp; Rigid</i> n = 13 (5Mo/8Fa)<br>BAP(-) n = 40 | TD-P n = 32 (19Mo/13Fa) | <b>ASD-P &lt; TD-P**<br/>BAP(+) <i>Social</i> &lt; BAP (-)**</b> |                                                      |

|                                 |                             |     |                        |                                                                                                                                                                    |                         |                                           |
|---------------------------------|-----------------------------|-----|------------------------|--------------------------------------------------------------------------------------------------------------------------------------------------------------------|-------------------------|-------------------------------------------|
| <b>Negative stimuli</b>         | Accuracy                    | USA | Losh et al (2009) [56] | ASD-P n = 83<br>BAP(+) <i>Social</i> n = 22<br>BAP(+)<br><i>Rigid/Perfectionistic</i> n = 34<br>BAP(+) <i>Social &amp; Rigid</i> n = 13 (5Mo/8Fa)<br>BAP(-) n = 40 | TD-P n = 32 (19Mo/13Fa) | <b>BAP(+) Social &gt; BAP(-)*</b>         |
| <b>Trustworthiness of faces</b> |                             |     |                        |                                                                                                                                                                    |                         |                                           |
| <b>Positive faces</b>           | Judgment of trustworthiness | USA | Losh et al (2009) [56] | ASD-P n = 83<br>BAP(+) <i>Social</i> n = 22<br>BAP(+)<br><i>Rigid/Perfectionistic</i> n = 34<br>BAP(+) <i>Social &amp; Rigid</i> n = 13 (5Mo/8Fa)<br>BAP(-) n = 40 | TD-P n = 32 (19Mo/13Fa) | <b>ASD-P &gt; TD-P***</b>                 |
| <b>Negative faces</b>           | Judgment of trustworthiness | USA | Losh et al (2009) [56] | ASD-P n = 83<br>BAP(+) <i>Social</i> n = 22<br>BAP(+)<br><i>Rigid/Perfectionistic</i> n = 34<br>BAP(+) <i>Social &amp; Rigid</i> n = 13 (5Mo/8Fa)<br>BAP(-) n = 40 | TD-P n = 32 (19Mo/13Fa) | <b>BAP(+) Social &lt; BAP(-), TD-P***</b> |
| <b>The Morphed faces task</b>   |                             |     |                        |                                                                                                                                                                    |                         |                                           |
| <b>Happy</b>                    | Accuracy                    | USA | Losh et al (2009) [56] | ASD-P n = 83<br>BAP(+) <i>Social</i> n = 22<br>BAP(+)<br><i>Rigid/Perfectionistic</i> n = 34<br>BAP(+) <i>Social &amp; Rigid</i> n = 13 (5Mo/8Fa)<br>BAP(-) n = 40 | TD-P n = 32 (19Mo/13Fa) | <b>n.s.</b>                               |

|                         |          |     |                        |                                                                                                                                                                   |                         |             |
|-------------------------|----------|-----|------------------------|-------------------------------------------------------------------------------------------------------------------------------------------------------------------|-------------------------|-------------|
| <b>Low morphedness</b>  | Accuracy | USA | Losh et al (2009) [56] | ASD-P n= 83<br>BAP(+) <i>Social</i> n = 22<br>BAP(+)<br><i>Rigid/Perfectionistic</i> n = 34<br>BAP(+) <i>Social &amp; Rigid</i> n = 13 (5Mo/8Fa)<br>BAP(-) n = 40 | TD-P n = 32 (19Mo/13Fa) | <b>n.s.</b> |
| <b>High morphedness</b> | Accuracy | USA | Losh et al (2009) [56] | ASD-P n= 83<br>BAP(+) <i>Social</i> n = 22<br>BAP(+)<br><i>Rigid/Perfectionistic</i> n = 34<br>BAP(+) <i>Social &amp; Rigid</i> n = 13 (5Mo/8Fa)<br>BAP(-) n = 40 | TD-P n = 32 (19Mo/13Fa) | <b>n.s.</b> |
| <b>Sad</b>              | Accuracy | USA | Losh et al (2009) [56] | ASD-P n= 83<br>BAP(+) <i>Social</i> n = 22<br>BAP(+)<br><i>Rigid/Perfectionistic</i> n = 34<br>BAP(+) <i>Social &amp; Rigid</i> n = 13 (5Mo/8Fa)<br>BAP(-) n = 40 | TD-P n = 32 (19Mo/13Fa) | <b>n.s.</b> |
| <b>Low morphedness</b>  | Accuracy | USA | Losh et al (2009) [56] | ASD-P n= 83<br>BAP(+) <i>Social</i> n = 22<br>BAP(+)<br><i>Rigid/Perfectionistic</i> n = 34<br>BAP(+) <i>Social &amp; Rigid</i> n = 13 (5Mo/8Fa)<br>BAP(-) n = 40 | TD-P n = 32 (19Mo/13Fa) | <b>n.s.</b> |
| <b>High morphedness</b> | Accuracy | USA | Losh et al (2009) [56] | ASD-P n= 83<br>BAP(+) <i>Social</i> n = 22<br>BAP(+)<br><i>Rigid/Perfectionistic</i> n = 34                                                                       | TD-P n = 32 (19Mo/13Fa) | <b>n.s.</b> |

|                              |          |     |                        |                                                                                                                                                                   |                         |                                 |
|------------------------------|----------|-----|------------------------|-------------------------------------------------------------------------------------------------------------------------------------------------------------------|-------------------------|---------------------------------|
|                              |          |     |                        | BAP(+) <i>Social &amp; Rigid</i> n = 13 (5Mo/8Fa)<br>BAP(-) n = 40                                                                                                |                         |                                 |
| <b>Afraid</b>                | Accuracy | USA | Losh et al (2009) [56] | ASD-P n= 83<br>BAP(+) <i>Social</i> n = 22<br>BAP(+)<br><i>Rigid/Perfectionistic</i> n = 34<br>BAP(+) <i>Social &amp; Rigid</i> n = 13 (5Mo/8Fa)<br>BAP(-) n = 40 | TD-P n = 32 (19Mo/13Fa) | <b>ASD-P &lt; TD-P**</b>        |
| <b>Low morphedness</b>       | Accuracy | USA | Losh et al (2009) [56] | ASD-P n= 83<br>BAP(+) <i>Social</i> n = 22<br>BAP(+)<br><i>Rigid/Perfectionistic</i> n = 34<br>BAP(+) <i>Social &amp; Rigid</i> n = 13 (5Mo/8Fa)<br>BAP(-) n = 40 | TD-P n = 32 (19Mo/13Fa) | <b>BAP(+) Social &lt; TD-P*</b> |
| <b>High morphedness</b>      | Accuracy | USA | Losh et al (2009) [56] | ASD-P n= 83<br>BAP(+) <i>Social</i> n = 22<br>BAP(+)<br><i>Rigid/Perfectionistic</i> n = 34<br>BAP(+) <i>Social &amp; Rigid</i> n = 13 (5Mo/8Fa)<br>BAP(-) n = 40 | TD-P n = 32 (19Mo/13Fa) | <b>n.s.</b>                     |
| <b>The Movie Stills task</b> | Accuracy |     |                        |                                                                                                                                                                   |                         |                                 |
| <b>Without faces</b>         |          | USA | Losh et al (2009) [56] | ASD-P n= 83<br>BAP(+) <i>Social</i> n = 22<br>BAP(+)<br><i>Rigid/Perfectionistic</i> n = 34<br>BAP(+) <i>Social &amp; Rigid</i> n = 13 (5Mo/8Fa)                  | TD-P n = 32 (19Mo/13Fa) | <b>n.s.</b>                     |

|                   |          |     |                        | BAP(-) n = 40                                                                                                                                                      |                         |                                                |
|-------------------|----------|-----|------------------------|--------------------------------------------------------------------------------------------------------------------------------------------------------------------|-------------------------|------------------------------------------------|
| <b>Sad</b>        | Accuracy | USA | Losh et al (2009) [56] | ASD-P n = 83<br>BAP(+) <i>Social</i> n = 22<br>BAP(+)<br><i>Rigid/Perfectionistic</i> n = 34<br>BAP(+) <i>Social &amp; Rigid</i> n = 13 (5Mo/8Fa)<br>BAP(-) n = 40 | TD-P n = 32 (19Mo/13Fa) | <b>ASD-P &lt; TD-P**</b>                       |
| <b>Angry</b>      | Accuracy | USA | Losh et al (2009) [56] | ASD-P n = 83<br>BAP(+) <i>Social</i> n = 22<br>BAP(+)<br><i>Rigid/Perfectionistic</i> n = 34<br>BAP(+) <i>Social &amp; Rigid</i> n = 13 (5Mo/8Fa)<br>BAP(-) n = 40 | TD-P n = 32 (19Mo/13Fa) | <b>ASD-P &lt; TD-P*</b>                        |
| <b>Afraid</b>     | Accuracy | USA | Losh et al (2009) [56] | ASD-P n = 83<br>BAP(+) <i>Social</i> n = 22<br>BAP(+)<br><i>Rigid/Perfectionistic</i> n = 34<br>BAP(+) <i>Social &amp; Rigid</i> n = 13 (5Mo/8Fa)<br>BAP(-) n = 40 | TD-P n = 32 (19Mo/13Fa) | <b>ASD-P &gt; TD-P***</b>                      |
| <b>With faces</b> | Accuracy | USA | Losh et al (2009) [56] | ASD-P n = 83<br>BAP(+) <i>Social</i> n = 22<br>BAP(+)<br><i>Rigid/Perfectionistic</i> n = 34<br>BAP(+) <i>Social &amp; Rigid</i> n = 13 (5Mo/8Fa)<br>BAP(-) n = 40 | TD-P n = 32 (19Mo/13Fa) | <b>BAP(+) <i>Social</i> &lt; BAP(-), TD-P*</b> |
| <b>Sad</b>        | Accuracy | USA | Losh et al (2009)[56]  | ASD-P n = 83<br>BAP(+) <i>Social</i> n = 22<br>BAP(+)                                                                                                              | TD-P n = 32 (19Mo/13Fa) | <b>n.s.</b>                                    |



|                                                                        |          |       |                           |                                                                                                                                                                   |                         |                          |
|------------------------------------------------------------------------|----------|-------|---------------------------|-------------------------------------------------------------------------------------------------------------------------------------------------------------------|-------------------------|--------------------------|
|                                                                        |          |       |                           | <i>Rigid/Perfectionistic</i> n = 34<br>BAP(+) <i>Social &amp; Rigid</i> n = 13 (5Mo/8Fa)<br>BAP(-) n = 40                                                         |                         |                          |
| <b>Angry</b>                                                           | Accuracy | USA   | Losh et al (2009) [56]    | ASD-P n= 83<br>BAP(+) <i>Social</i> n = 22<br>BAP(+)<br><i>Rigid/Perfectionistic</i> n = 34<br>BAP(+) <i>Social &amp; Rigid</i> n = 13 (5Mo/8Fa)<br>BAP(-) n = 40 | TD-P n = 32 (19Mo/13Fa) | <b>ASD-P &lt; TD-P**</b> |
| <b>Afraid</b>                                                          | Accuracy | USA   | Losh et al (2009) [56]    | ASD-P n= 83<br>BAP(+) <i>Social</i> n = 22<br>BAP(+)<br><i>Rigid/Perfectionistic</i> n = 34<br>BAP(+) <i>Social &amp; Rigid</i> n = 13 (5Mo/8Fa)<br>BAP(-) n = 40 | TD-P n = 32 (19Mo/13Fa) | <b>n.s.</b>              |
| <b>Schematic Line Drawings (emotional labeling of facial patterns)</b> |          |       |                           |                                                                                                                                                                   |                         |                          |
| <b>Anger</b>                                                           |          | Italy | Palermo et al (2006) [61] | ASD-P n= 40 (20Mo/20Fa)                                                                                                                                           | TD-P n= 40 (20Mo/20Fa)  | <b>n.s</b>               |
| <b>Happiness</b>                                                       |          | Italy | Palermo et al (2006) [61] | ASD-P n= 40 (20Mo/20Fa)                                                                                                                                           | TD-P n= 40 (20Mo/20Fa)  | <b>n.s.</b>              |
| <b>Sadness</b>                                                         |          | Italy | Palermo et al (2006) [61] | ASD-P n= 40 (20Mo/20Fa)                                                                                                                                           | TD-P n= 40 (20Mo/20Fa)  | <b>ASD-P &lt; TD-P**</b> |
| <b>Surprise</b>                                                        |          | Italy | Palermo et al (2006) [61] | ASD-P n= 40 (20Mo/20Fa)                                                                                                                                           | TD-P n= 40 (20Mo/20Fa)  | <b>n.s.</b>              |

|                                                      |                                                                     |                                 |           |                               |                           |                                                     |                                                      |                                                           |
|------------------------------------------------------|---------------------------------------------------------------------|---------------------------------|-----------|-------------------------------|---------------------------|-----------------------------------------------------|------------------------------------------------------|-----------------------------------------------------------|
|                                                      | <b>Disgust</b>                                                      |                                 | Italy     | Palermo et al (2006) [61]     | ASD-P n= 40 (20Mo/20Fa)   | TD-P n= 40 (20Mo/20Fa)                              | <b>ASD-P &lt; TD-P**</b>                             |                                                           |
|                                                      | <b>Overall recognition</b>                                          |                                 | Italy     | Palermo et al (2006) [61]     | ASD-P n= 40 (20Mo/20Fa)   | TD-P n= 40 (20Mo/20Fa)                              | <b>ASD-P &lt; TD-P**</b>                             |                                                           |
|                                                      | <b>Emotion Matching Task</b>                                        |                                 | USA       | Smalley & Asarnow (1990) [45] | ASD-P n = 15              | TD-P n = 12                                         | <b>n.s.</b>                                          | <b>ASD-P vs. TD-P 0.06</b>                                |
|                                                      | <b>Emotion Labeling Task</b>                                        |                                 | USA       | Smalley & Asarnow (1990) [45] | ASD-P n = 15              | TD-P n = 12                                         | <b>n.s.</b>                                          | <b>ASD-P vs. TD-P 0.19</b>                                |
| <b>Executive Function</b><br><br><b>Set-Shifting</b> | <b>Intradimensional - Extradimensional set-shifting task (IDED)</b> | Perseveration (EDS Stage)       | Australia | Wong et al (2006)[62]         | ASD-P n = 145 (80Mo/65Fa) | TD-P n = 96 (57Mo/39Fa)                             | <b>n.s.</b>                                          |                                                           |
|                                                      |                                                                     | Learned irrelevance (EDS Stage) | Australia | Wong et al (2006) [62]        | ASD-P n = 145 (80Mo/65Fa) | TD-P n = 96 (57Mo/39Fa)                             | <b>ASD-P &gt; TD-P*</b><br><b>ASD-Fa &gt; TD-Fa*</b> | <b>ASD-Fa vs. TD-Fa 0.52</b>                              |
|                                                      |                                                                     | Trials to criterion (EDS Stage) | France    | Hughes et al (1997) [63]      | ASD-P n=40 (20Mo/20Fa)    | LD-P n=40 (22Mo/18Fa)<br>UA n=36 (18M, 15F)         | <b>ASD-P &gt; LD-P**</b><br><b>ASD-P &gt; UA***</b>  | <b>ASD-P vs. LD-P 0.69</b><br><b>ASD-P vs. UA 0.83</b>    |
|                                                      |                                                                     | Errors to criterion (EDS Stage) | France    | Hughes et al (1997) [63]      | ASD-P n=40 (20Mo/20Fa)    | LD-P n=40 (22Mo/18Fa)<br>UA n=36 (18M, 15F)         | <b>ASD-P &gt; LD-P*</b><br><b>ASD-P &gt; UA**</b>    | <b>ASD-P vs. LD-P 0.64</b><br><b>ASD-P vs. UA 0.70</b>    |
|                                                      | <b>Wisconsin Card Sorting Test (WCST)</b>                           | Perservative errors             | Germany   | Bölte & Poustka (2006) [50]   | ASD-P n=62 (33Mo/29Fa)    | EOS-P n = 36 (20Mo/16Fa)<br>MR-P n = 30 (16Mo/14Fa) | <b>n.s.</b>                                          | <b>ASD-P vs. EOS-P 0.06</b><br><b>ASD-P vs. MR-P 0.18</b> |
|                                                      | <b>Trail Making Test (A &amp; B)</b>                                | Total time to complete          | Germany   | Bölte & Poustka (2006) [50]   | ASD-P n=62 (33Mo/29Fa)    | EOS-P n = 36 (20Mo/16Fa)<br>MR-P n = 30 (16Mo/14Fa) | <b>n.s.</b>                                          | <b>ASD-P vs. EOS-P 0.38</b><br><b>ASD-P vs. MR-P 0.13</b> |

|                           |                              |                            |                        |                                                                                                                                                                   |                                                                                                                                                                   |                                                     |                                                  |                                                           |
|---------------------------|------------------------------|----------------------------|------------------------|-------------------------------------------------------------------------------------------------------------------------------------------------------------------|-------------------------------------------------------------------------------------------------------------------------------------------------------------------|-----------------------------------------------------|--------------------------------------------------|-----------------------------------------------------------|
|                           |                              |                            | USA                    | Losh et al (2009) [56]                                                                                                                                            | ASD-P n= 83<br>BAP(+) <i>Social</i> n = 22<br>BAP(+)<br><i>Rigid/Perfectionistic</i> n = 34<br>BAP(+) <i>Social &amp; Rigid</i> n = 13 (5Mo/8Fa)<br>BAP(-) n = 40 | TD-P n = 32 (19Mo/13Fa)                             | n.s.                                             |                                                           |
| <b>Planning</b>           | <b>Tower of London (ToL)</b> | Number of extra moves      | France                 | Hughes et al (1997) [63]                                                                                                                                          | ASD-P n=40 (20Mo/20Fa)                                                                                                                                            | LD-P n=40 (22Mo/18Fa)<br>UA n=36 (18M, 15F)         | <b>ASD-P &gt; UA*</b>                            | <b>ASD-P vs. LD-P 0.41</b><br><b>ASD-P vs. UA 0.93</b>    |
|                           |                              | Adjusted extra moves score | Australia              | Wong et al (2006) [62]                                                                                                                                            | ASD-P n = 145 (80Mo/65Fa)                                                                                                                                         | TD-P n = 96 (57Mo/39Fa)                             | n.s.                                             | <b>ASD-P vs. TD-P 0.07</b>                                |
|                           |                              | Rule violations            | Australia              | Wong et al (2006) [62]                                                                                                                                            | ASD-P n = 145 (80Mo/65Fa)                                                                                                                                         | TD-P n = 96 (57Mo/39Fa)                             | n.s.                                             |                                                           |
|                           |                              | Solutions correct          | France                 | Hughes et al (1997) [63]                                                                                                                                          | ASD-P n=40 (20Mo/20Fa)                                                                                                                                            | LD-P n=40 (22Mo/18Fa)<br>UA n=36 (18M, 15F)         | <b>ASD-P &lt; UA***</b>                          | <b>ASD-P vs. LD-P 0.34</b><br><b>ASD-P vs. UA 0.93</b>    |
|                           | <b>Tower of Hanoi (ToH)</b>  | Total time to complete     | Germany                | Bölte & Poustka (2006) [50]<br><i>4 ring version</i>                                                                                                              | ASD-P n=62 (33Mo/29Fa)                                                                                                                                            | EOS-P n = 36 (20Mo/16Fa)<br>MR-P n = 30 (16Mo/14Fa) | n.s.                                             | <b>ASD-P vs. EOS-P 0.45</b><br><b>ASD-P vs. MR-P 0.01</b> |
| Planning efficiency score |                              | USA                        | Losh et al (2009) [56] | ASD-P n= 83<br>BAP(+) <i>Social</i> n = 22<br>BAP(+)<br><i>Rigid/Perfectionistic</i> n = 34<br>BAP(+) <i>Social &amp; Rigid</i> n = 13 (5Mo/8Fa)<br>BAP(-) n = 40 | TD-P n = 32 (19Mo/13Fa)                                                                                                                                           | n.s.                                                |                                                  |                                                           |
|                           |                              |                            | USA                    | Piven & Palmer (1997) [46]                                                                                                                                        | MPX-P n= 48 (25Mo/23Fa)                                                                                                                                           | DS-P n = 60 (30Mo/30Fa)                             | <i>3 ring version</i><br><b>MPX-P &lt; DS-P*</b> | <i>3 ring version</i><br><b>MPX-P vs. DS-P 0.40</b>       |

|                                            |                                                               |                                                                         |           |                          |                                                                                                                                                                 |                                             |                               |                                 |                                          |
|--------------------------------------------|---------------------------------------------------------------|-------------------------------------------------------------------------|-----------|--------------------------|-----------------------------------------------------------------------------------------------------------------------------------------------------------------|---------------------------------------------|-------------------------------|---------------------------------|------------------------------------------|
|                                            |                                                               |                                                                         | USA       | Losh et al (2009) [56]   | ASD-P n = 83<br>BAP(+) <i>Social</i> n = 22<br>BAP(+) <i>Rigid/Perfectionistic</i> n = 34<br>BAP(+) <i>Social &amp; Rigid</i> n = 13 (5Mo/8Fa)<br>BAP(-) n = 40 | TD-P n = 32 (19Mo/13Fa)                     | n.s.                          | 4 ring version<br>MPX-P < DS-P* | 4 ring version<br>MPX-P vs. DS-P 0.48    |
| <b>Generativity / Ideational Fluency</b>   | <b>Pattern Meanings</b>                                       | Overall response generativity                                           | Australia | Wong et al (2006) [62]   | ASD-P n = 145 (80Mo/65Fa)                                                                                                                                       | TD-P n = 96 (57Mo/39Fa)                     | ASD-P < TD-P***               |                                 | ASD-P vs. TD-P 0.51                      |
|                                            | <b>Visual Search Test</b>                                     | Between search errors                                                   | France    | Hughes et al (1997) [63] | ASD-P n=40 (20Mo/20Fa)                                                                                                                                          | LD-P n=40 (22Mo/18Fa)<br>UA n=36 (18M, 15F) | ASD-P > UA*<br>ASD-Fa > UA-M* |                                 | ASD-P vs. LD-P 0.27<br>ASD-P vs. UA 0.95 |
|                                            |                                                               | Within search errors                                                    | France    | Hughes et al (1997) [63] | ASD-P n=40 (20Mo/20Fa)                                                                                                                                          | LD-P n=40 (22Mo/18Fa)<br>UA n=36 (18M, 15F) | n.s.                          |                                 |                                          |
| <b>Spatial Working Memory / Inhibition</b> | <b>The Delayed Oculomotor Task (Eye movement abnormality)</b> | Percent premature saccades<br>1s delay<br>3s delay                      | USA       | Koczat et al (2002) [77] | ASD-P n = 11 (7Mo/4Fa)                                                                                                                                          | UA n = 17 (8F/9M)                           | n.s.                          |                                 | ASD-P vs. UA 0.18<br>ASD-P vs. UA 0.55   |
|                                            |                                                               | Latency remembered saccades<br>1s delay<br>3s delay                     | USA       | Koczat et al (2002) [77] | ASD-P n = 11 (7Mo/4Fa)                                                                                                                                          | UA n = 17 (8F/9M)                           | n.s.                          |                                 | ASD-P vs. UA 0.41<br>ASD-P vs. UA 0.04   |
|                                            |                                                               | Spatial error of remembered saccades (accuracy)<br>1s delay<br>3s delay | USA       | Koczat et al (2002) [77] | ASD-P n = 11 (7Mo/4Fa)                                                                                                                                          | UA n = 17 (8F/9M)                           | ASD-P < UA**                  |                                 | ASD-P vs. UA 1.27<br>ASD-P vs. UA 0.68   |

|                                                    |                                                |                                     |             |                                 |                          |                                                     |                                                           |                                                                                                                                |
|----------------------------------------------------|------------------------------------------------|-------------------------------------|-------------|---------------------------------|--------------------------|-----------------------------------------------------|-----------------------------------------------------------|--------------------------------------------------------------------------------------------------------------------------------|
| <b>Verbal Working Memory</b>                       | <b>Response Inhibition and Load (RIL)</b>      | No. of errors                       | Australia   | Wong et al (2006) [62]          | ASD-P n = 141            | TD-P n = 94                                         | n.s.                                                      | <b>ASD-P vs. TD-P 0.28</b>                                                                                                     |
|                                                    |                                                | Reaction time for correct responses | Australia   | Wong et al (2006) [62]          | ASD-P n = 141            | TD-P n = 94                                         | n.s.                                                      | <b>ASD-P vs. TD-P 0.04</b>                                                                                                     |
|                                                    |                                                | Working memory measure              | Australia   | Wong et al (2006) [62]          | ASD-P n = 141            | TD-P n = 94                                         | n.s.                                                      | <b>ASD-P vs. TD-P 0.08</b>                                                                                                     |
|                                                    | <b>Auditory Consonant Trigrams (ACT)</b>       | Accuracy                            | Turkey      | Gocken et al (2009) [57]        | ASD-P n = 76 (38Mo/38Fa) | N-P n = 41 (21Mo/20Fa)                              | <b>ASD-P &lt; N-P**</b>                                   | <b>ASD-P vs. N-P 0.55</b>                                                                                                      |
|                                                    | <b>Verbal Fluency (letters KAS in Turkish)</b> | Accuracy                            | Turkey      | Gocken et al (2009) [57]        | ASD-P n = 76 (38Mo/38Fa) | N-P n = 41 (21Mo/20Fa)                              | n.s.                                                      | <b>ASD-P vs. N-P 0.26</b>                                                                                                      |
|                                                    | <b>Stroop Interference Test</b>                | Interference score                  | Turkey      | Gocken et al (2009) [57]        | ASD-P n = 76 (38Mo/38Fa) | N-P n = 41 (21Mo/20Fa)                              | n.s.                                                      | <b>ASD-P vs. N-P 0.2</b>                                                                                                       |
| <b>Central Coherence (Local visual processing)</b> | <b>Embedded Figures Test (EFT)</b>             | Reaction Time                       | UK          | Baron-Cohen & Hammer (1997) [7] | AS-P n = 30 (15Mo/15Fa)  | TD-P n = 30 (15Mo/15Fa)                             | <b>ASD-Fa &gt; N-Fa**</b><br><b>ASD-Mo &gt; N-Mo**</b>    | <b>ASD-Fa vs. N-Fa 0.51</b><br><b>ASD-Mo vs. N-Fa 0.68</b>                                                                     |
| <b>Disembedding Performance</b>                    |                                                |                                     | Germany     | Bölte & Poustka (2006) [7]      | ASD-P n=62 (33Mo/29Fa)   | EOS-P n = 36 (20Mo/16Fa)<br>MR-P n = 30 (16Mo/14Fa) | <b>ASD-P &gt; EOS-P***</b><br><b>ASD-P &gt; MR-P*</b>     | <b>ASD-P vs. EOS-P 1.60</b><br><b>ASD-P vs. MR-P 0.79</b>                                                                      |
|                                                    |                                                |                                     | Netherlands | de Jonge et al (2006) [65]      | MPX-P n=51 (26Mo/25Fa)   | DS-P n = 54 (28Fa/26Mo)                             | n.s.                                                      | <b>MPX-P vs. DS-P 0.01</b><br><b>MPX-Fa vs. DS-Fa 0.04</b><br><b>MPX-Mo vs. DS-Mo 0.09</b>                                     |
|                                                    |                                                |                                     | UK          | Happé et al (2001) [64]         | ASD-P n = 43 (21Mo/22Fa) | DLX-P n = 30 (15Mo/15Fa)<br>TD-P n = 20 (10Mo/10Fa) | <b>ASD-Fa &gt; DLX-Fa**</b><br><b>ASD-Fa &gt; TD-Fa**</b> | <b>ASD-Mo vs. DLX-Mo 0.54</b><br><b>ASD-Mo vs. TD-Mo 0.64</b><br><b>ASD-Fa vs. DLX-Fa 1.11</b><br><b>ASD-Fa vs. TD-Fa 1.09</b> |
|                                                    |                                                |                                     | USA         | Losh et al                      | ASD-P n= 83              | TD-P n = 32                                         | n.s.                                                      |                                                                                                                                |

|                                    |                                                                  |               |                            |                         |                                                                                                                                                                    |                                                     |                  |                                                                                                    |
|------------------------------------|------------------------------------------------------------------|---------------|----------------------------|-------------------------|--------------------------------------------------------------------------------------------------------------------------------------------------------------------|-----------------------------------------------------|------------------|----------------------------------------------------------------------------------------------------|
|                                    |                                                                  |               |                            | (2009) [56]             | BAP(+) <i>Social</i> n = 22<br>BAP(+)<br><i>Rigid/Perfectionistic</i> n = 34<br>BAP(+) <i>Social &amp; Rigid</i> n = 13 (5Mo/8Fa)<br>BAP(-) n = 40                 | (19Mo/13Fa)                                         |                  |                                                                                                    |
|                                    | Accuracy                                                         | Netherlands   | de Jonge et al (2006) [65] |                         | MPX-P n=51 (26Mo/25Fa)                                                                                                                                             | DS-P n = 54 (28Fa/26Mo)                             | n.s.             | MPX-P vs. DS-P 0.16<br>MPX-Fa vs. DS-Fa 0.21<br>MPX-Mo vs. DS-Mo 0.11                              |
|                                    |                                                                  | UK            | Happé et al (2001) [64]    |                         | ASD-P n = 43 (21Mo/22Fa)                                                                                                                                           | DLX-P n = 30 (15Mo/15Fa)<br>TD-P n = 20 (10Mo/10Fa) | n.s.             | ASD-Mo vs. DLX-Mo 0.26<br>ASD-Mo vs. TD-Mo 0.77<br>ASD-Fa vs. DLX-Fa 0.17<br>ASD-Fa vs. TD-Fa 0.31 |
|                                    |                                                                  | USA           | Losh et al (2009) [56]     |                         | ASD-P n = 83<br>BAP(+) <i>Social</i> n = 22<br>BAP(+)<br><i>Rigid/Perfectionistic</i> n = 34<br>BAP(+) <i>Social &amp; Rigid</i> n = 13 (5Mo/8Fa)<br>BAP(-) n = 40 | TD-P n = 32 (19Mo/13Fa)                             | n.s.             |                                                                                                    |
|                                    | No. of incorrect responses                                       | Netherlands   | de Jonge et al (2006) [65] |                         | MPX-P n=51 (26Mo/25Fa)                                                                                                                                             | DS-P n = 54 (28Fa/26Mo)                             | ASD-Fa < DS-Fa*  | MPX-P vs. DS-P 0.32<br>MPX-Fa vs. DS-Fa 0.52<br>MPX-Mo vs. DS-Mo 0.18                              |
|                                    | Titchener Circles Illusion                                       | No. of errors | UK                         | Happé et al (2001) [64] | ASD-P n = 43 (21Mo/22Fa)                                                                                                                                           | DLX-P n = 30 (15Mo/15Fa)<br>TD-P n = 20 (10Mo/10Fa) | ASD-Fa < DLX-Fa* |                                                                                                    |
| <b>Mental Segmentation Ability</b> | Unsegmented Block Design task (adaptation from Weschler subtest) | Reaction time | UK                         | Happé et al (2001) [64] | ASD-P n = 43 (21Mo/22Fa)                                                                                                                                           | DLX-P n = 30 (15Mo/15Fa)<br>TD-P n = 20 (10Mo/10Fa) | ASD-Fa > TD-Fa*  | ASD-Mo vs. DLX-Mo 0.54<br>ASD-Mo vs. TD-Mo 0.24<br>ASD-Fa vs. DLX-Fa 0.64<br>ASD-Fa vs. TD-Fa 0.84 |
|                                    |                                                                  |               | USA                        | Losh et al (2009) [56]  | ASD-P n = 83<br>BAP(+) <i>Social</i> n = 22<br>BAP(+)<br><i>Rigid/Perfectionistic</i> n =                                                                          | TD-P n = 32 (19Mo/13Fa)                             | n.s.             |                                                                                                    |

|                    |                                                                               |                     |             |                                |                                                                                                                                                                 |                                                     |                           |                                                                                                                                |
|--------------------|-------------------------------------------------------------------------------|---------------------|-------------|--------------------------------|-----------------------------------------------------------------------------------------------------------------------------------------------------------------|-----------------------------------------------------|---------------------------|--------------------------------------------------------------------------------------------------------------------------------|
|                    |                                                                               |                     |             |                                | 34<br>BAP(+) <i>Social &amp; Rigid</i> n = 13 (5Mo/8Fa)<br>BAP(-) n = 40                                                                                        |                                                     |                           |                                                                                                                                |
| <b>Attentional</b> | <b>Segmented Block Design task (adaptation from Weschler subtest)</b>         | Reaction time       | UK          | Happé et al (2001) [64]        | ASD-P n = 43 (21Mo/22Fa)                                                                                                                                        | DLX-P n = 30 (15Mo/15Fa)<br>TD-P n = 20 (10Mo/10Fa) | n.s.                      | <b>ASD-Mo vs. DLX-Mo 0.04</b><br><b>ASD-Mo vs. TD-Mo 0.63</b><br><b>ASD-Fa vs. DLX-Fa 0.10</b><br><b>ASD-Fa vs. TD-Fa 0.17</b> |
|                    |                                                                               |                     | USA         | Losh et al (2009) [56]         | ASD-P n = 83<br>BAP(+) <i>Social</i> n = 22<br>BAP(+) <i>Rigid/Perfectionistic</i> n = 34<br>BAP(+) <i>Social &amp; Rigid</i> n = 13 (5Mo/8Fa)<br>BAP(-) n = 40 | TD-P n = 32 (19Mo/13Fa)                             | n.s.                      |                                                                                                                                |
|                    | <b>Block Design task (Weschler subtest)</b>                                   | Reaction time       | Netherlands | Scheeren & Stauder (2008) [24] | ASD-P n = 25 (12Mo/13Fa)                                                                                                                                        | TD-P n = 25 (12Mo/13Fa)                             | n.s.                      | <b>ASD-Fa vs. TD-Fa 0.19</b><br><b>ASD-Mo vs. TD-Mo 0.11</b>                                                                   |
|                    |                                                                               |                     | Germany     | Bölte & Poustka (2006) [50]    | ASD n = 62 (33Mo/29Fa)                                                                                                                                          | EOS-P n = 36 (20Mo/16Fa)<br>MR-P n = 30 (16Mo/14Fa) | n.s.                      | <b>ASD-P vs. EOS-P 0.33</b><br><b>ASD-P vs. MR-P 0.52</b>                                                                      |
|                    | <b>Block design reconstruction task (patterns by Akshoomoff &amp; Stiles)</b> | Accuracy            | Netherlands | de Jonge et al (2009) [66]     | MPX-P n = 51 (26Mo/25Fa)                                                                                                                                        | DS-P n = 57 (28Mo/29Fa)                             | n.s.                      | <b>MPX-P vs. DS-P 0.16</b>                                                                                                     |
|                    |                                                                               | Reconstruction time | Netherlands | de Jonge et al (2009) [66]     | MPX-P n = 51 (26Mo/25Fa)                                                                                                                                        | DS-P n = 57 (28Mo/29Fa)                             | n.s.                      |                                                                                                                                |
|                    |                                                                               | Mean no. of errors  | Netherlands | de Jonge et al (2009) [66]     | MPX-P n = 51 (26Mo/25Fa)                                                                                                                                        | DS-P n = 57 (28Mo/29Fa)                             | n.s.                      | <b>MPX-P vs. DS-P 0.10</b>                                                                                                     |
|                    | <b>Detection Task (Reaction time task)</b>                                    | Eyes task (social)  | Netherlands | Scheeren & Stauder (2008) [24] | ASD-P n = 25 (12Mo/13Fa)                                                                                                                                        | TD-P n = 25 (12Mo/13Fa)                             | <b>ASD-Fa &gt; TD-Fa*</b> |                                                                                                                                |
|                    |                                                                               | Arrows task         | Netherlands | Scheeren &                     | ASD-P n = 25                                                                                                                                                    | TD-P n = 25                                         | n.s.                      |                                                                                                                                |

|                                    |                                            |                                               |             |                               |                                                                                                                                                                    |                                                           |                                                                                                                                                                    |                            |
|------------------------------------|--------------------------------------------|-----------------------------------------------|-------------|-------------------------------|--------------------------------------------------------------------------------------------------------------------------------------------------------------------|-----------------------------------------------------------|--------------------------------------------------------------------------------------------------------------------------------------------------------------------|----------------------------|
| <b>Engagement</b>                  |                                            | (non-social)                                  |             | Stauder<br>(2008) [24]        | (12Mo/13Fa)                                                                                                                                                        | (12Mo/13Fa)                                               |                                                                                                                                                                    |                            |
| <b>Global Sentence Completions</b> | <b>Sentence Completion task</b>            | Errors (local completions) and long delays    | UK          | Happé et al<br>(2001) [64]    | ASD-P n = 43<br>(21Mo/22Fa)                                                                                                                                        | DLX-P n = 30<br>(15Mo/15Fa)<br>TD-P n = 20<br>(10Mo/10Fa) | <b>ASD-P &gt; DLX-P &gt; TD-P***</b><br><b>ASD-Fa &gt; DLX - Fa***</b><br><b>ASD-Fa &gt; TD-Fa***</b><br><b>ASD-Mo &gt; DLX-Mo**</b><br><b>ASD-Mo &gt; TD-Mo**</b> |                            |
|                                    |                                            | Frequency of errors (no. of global responses) | USA         | Losh et al<br>(2009) [56]     | ASD-P n = 83<br>BAP(+) <i>Social</i> n = 22<br>BAP(+)<br><i>Rigid/Perfectionistic</i> n = 34<br>BAP(+) <i>Social &amp; Rigid</i> n = 13 (5Mo/8Fa)<br>BAP(-) n = 40 | TD-P n = 32<br>(19Mo/13Fa)                                | <b>ASD-P &gt; TD-P**</b>                                                                                                                                           |                            |
|                                    |                                            | Response time                                 | USA         | Losh et al<br>(2009) [56]     | ASD-P n = 83<br>BAP(+) <i>Social</i> n = 22<br>BAP(+)<br><i>Rigid/Perfectionistic</i> n = 34<br>BAP(+) <i>Social &amp; Rigid</i> n = 13 (5Mo/8Fa)<br>BAP(-) n = 40 | TD-P n = 32<br>(19Mo/13Fa)                                | <b>ASD-P &gt; TD-P*</b><br><b>BAP(+)</b><br><b>Rigid/Perfectionistic &lt; TD-P**</b><br><b>BAP(-) &lt; TD-P*</b>                                                   |                            |
| <b>Visual Processing</b>           | <b>Vistech contrast sensitivity charts</b> | Mean contrast sensitivity threshold           | Netherlands | de Jonge et al<br>(2007) [67] | MPX-P n = 51<br>(26Mo/25Fa)                                                                                                                                        | DS-P n = 52<br>(25Fa/27Mo)                                | n.s.                                                                                                                                                               | <b>MPX-P vs. DS-P 0.55</b> |
| <b>Contrast Sensitivity</b>        |                                            |                                               |             |                               |                                                                                                                                                                    |                                                           |                                                                                                                                                                    |                            |
| <b>Motion Discrimination</b>       | <b>Motion Coherence Task</b>               | Mean motion coherence threshold               | Netherlands | de Jonge et al<br>(2007) [67] | MPX-P n = 51<br>(26Mo/25Fa)                                                                                                                                        | DS-P n = 52<br>(25Fa/27Mo)                                | n.s.                                                                                                                                                               | <b>MPX-P vs. DS-P 0.25</b> |
|                                    | <b>Moving Shape Task</b>                   | Reaction time                                 | Netherlands | de Jonge et al<br>(2007) [67] | MPX-P n = 51<br>(26Mo/25Fa)                                                                                                                                        | DS-P n = 52<br>(25Fa/27Mo)                                | n.s.                                                                                                                                                               | <b>MPX-P vs. DS-P 0.17</b> |



|                                |                                                 |               |             |                               |                             |                            |      |                            |
|--------------------------------|-------------------------------------------------|---------------|-------------|-------------------------------|-----------------------------|----------------------------|------|----------------------------|
| <b>Form<br/>Discrimination</b> | <b>Form<br/>Discrimination<br/>(Shape) Task</b> | Reaction Time | Netherlands | de Jonge et al<br>(2007) [67] | MPX-P n = 51<br>(26Mo/25Fa) | DS-P n = 52<br>(25Fa/27Mo) | n.s. | <b>MPX-P vs. DS-P 0.05</b> |
|--------------------------------|-------------------------------------------------|---------------|-------------|-------------------------------|-----------------------------|----------------------------|------|----------------------------|

*Note:* ASD, Autism Spectrum Disorder; BAP, Broad Autism Phenotype; BAP(+), BAP present; BAP (-), BAP absent; P, Parent; Mo, Mother; Fa, Father; M, Male; F, Female; MPX, Multiple incidence autism families; SPX, Single incidence autism families; ALN, Autism without language impairment; ALI, Autism with language impairment; DLX, Dyslexia; DS, Down Syndrome; EOS, Early onset Schizophrenia; LBW, low birth weight; LD, learning difficulties; N, Normative sample; MR, Mental Retardation; Sch SPX, single incidence Schizophrenia families; Sch MPX, multiple incidence Schizophrenia families; SLI, Specific Language Impairment; TD, typically developing; UA, Unaffected adult

\*p<0.05; \*\*p<0.01; \*\*\*p<0.001

**Supplementary Table 3. Other Psychiatric Conditions Endophenotype Matrix – Review of studies of parents of autistic probands.**

| Domain                       | Method / Measure                                | Factors / Subscales    | Country | Study                    | ASD Parent Group Characteristics                             | Control Group Characteristics                                                   | Key Findings in relation to Proband Diagnosis |                                                                                                                                            |
|------------------------------|-------------------------------------------------|------------------------|---------|--------------------------|--------------------------------------------------------------|---------------------------------------------------------------------------------|-----------------------------------------------|--------------------------------------------------------------------------------------------------------------------------------------------|
|                              |                                                 |                        |         |                          |                                                              |                                                                                 | P value                                       | Effect Size (d)                                                                                                                            |
| Other Psychiatric Conditions | Brief Psychiatric Rating Scale (BPRS)           | Anxiety                | Iran    | Gocken et al (2009) [57] | ASD-P n = 76 (38Mo/38Fa)                                     | N-P n = 41 (21Mo/20Fa)                                                          | n.s.                                          | ASD-P vs. N-P 0.29                                                                                                                         |
|                              |                                                 | Depression             | Iran    | Gocken et al (2009) [57] | ASD-P n = 76 (38Mo/38Fa)                                     | N-P n = 41 (21Mo/20Fa)                                                          | ASD-P > N-P*                                  | ASD-P vs. N-P 0.44                                                                                                                         |
|                              | Personality Style and Disorder Inventory (PSSI) | Reserved/schizoid      | Germany | Bölte et al (2007) [51]  | ASD SPX-P n = 87 (48Mo/39Fa)<br>ASD MPX-P n = 38 (21Mo/17Fa) | OCD-P n = 37 (19Mo/18Fa)<br>EOS-P n = 34 (20Mo/14Fa)<br>MR-P n = 27 (15Mo/12Fa) | SPX-P / MPX-P > OCD-P, EOS-P**                | MPX-P vs. OCD-P 1.07<br>MPX-P vs. EOS-P 1.09<br>MPX-P vs. MR-P 0.14<br>SPX-P vs. OCD-p 1.06<br>SPX-P vs. EOS-P 1.18<br>SPX-P vs. MR-P 0.15 |
|                              |                                                 | Self-critical/insecure | Germany | Bölte et al (2007) [51]  | ASD SPX-P n = 87 (48Mo/39Fa)<br>ASD MPX-P n = 38 (21Mo/17Fa) | OCD-P n = 37 (19Mo/18Fa)<br>EOS-P n = 34 (20Mo/14Fa)<br>MR-P n = 27 (15Mo/12Fa) | ASD SPX-P /ASD MPX-P > EOS-P**                | MPX-P vs. OCD-P 0.31<br>MPX-P vs. EOS-P 1.15<br>MPX-P vs. MR-P 0.32<br>SPX-P vs. OCD-p 0.02<br>SPX-P vs. EOS-P 0.86<br>SPX-P vs. MR-P 0.02 |
|                              |                                                 | Critical/negativistic  | Germany | Bölte et al (2007) [51]  | ASD SPX-P n = 87 (48Mo/39Fa)<br>ASD MPX-P n = 38 (21Mo/17Fa) | OCD-P n = 37 (19Mo/18Fa)<br>EOS-P n = 34 (20Mo/14Fa)<br>MR-P n = 27 (15Mo/12Fa) | SPX-P /MPX-P > EOS-P**                        | MPX-P vs. OCD-P 0.29<br>MPX-P vs. EOS-P 0.92<br>MPX-P vs. MR-P 0.03<br>SPX-P vs. OCD-p 0.17<br>SPX-P vs. EOS-P 0.74<br>SPX-P vs. MR-P 0.06 |
|                              |                                                 | Spontaneous/borderline | Germany | Bölte et al (2007) [51]  | ASD SPX-P n = 87 (48Mo/39Fa)<br>ASD MPX-P n = 38 (21Mo/17Fa) | OCD-P n = 37 (19Mo/18Fa)<br>EOS-P n = 34 (20Mo/14Fa)<br>MR-P n = 27 (15Mo/12Fa) | MPX-P > EOS-P**                               | MPX-P vs. OCD-P 0.18<br>MPX-P vs. EOS-P 0.25<br>MPX-P vs. MR-P 0.09<br>SPX-P vs. OCD-p 0.39<br>SPX-P vs. EOS-P 0.72<br>SPX-P vs. MR-P 0.04 |
|                              |                                                 | Quiet/depressive       | Germany | Bölte et al (2007) [51]  | ASD SPX-P n = 87 (48Mo/39Fa)<br>ASD MPX-P n = 38 (21Mo/17Fa) | OCD-P n = 37 (19Mo/18Fa)<br>EOS-P n = 34 (20Mo/14Fa)                            | SPX-P /MPX-P > EOS-P**                        | MPX-P vs. OCD-P 0.53<br>MPX-P vs. EOS-P 1.03<br>MPX-P vs. MR-P 0.31<br>SPX-P vs. OCD-p 0.35                                                |

|                                                                                       |                           |         |                            |                                                              |                                                                                 |                                          |                                                                                                                                            |
|---------------------------------------------------------------------------------------|---------------------------|---------|----------------------------|--------------------------------------------------------------|---------------------------------------------------------------------------------|------------------------------------------|--------------------------------------------------------------------------------------------------------------------------------------------|
|                                                                                       |                           |         |                            |                                                              | MR-P n = 27<br>(15Mo/12Fa)                                                      |                                          | SPX-P vs. EOS-P 0.87<br>SPX-P vs. MR-P 0.16                                                                                                |
| <b>Symptom Checklist-90-Revised (SCL-90-R)</b>                                        | Depression                | Germany | Bölte et al (2007) [51]    | ASD SPX-P n = 87 (48Mo/39Fa)<br>ASD MPX-P n = 38 (21Mo/17Fa) | OCD-P n = 37 (19Mo/18Fa)<br>EOS-P n = 34 (20Mo/14Fa)<br>MR-P n = 27 (15Mo/12Fa) | <b>MPX-P &gt; OCD-P, EOS-P**</b>         | MPX-P vs. OCD-P 0.89<br>MPX-P vs. EOS-P 1.06<br>MPX-P vs. MR-P 0.66<br>SPX-P vs. OCD-p 0.42<br>SPX-P vs. EOS-P 0.57<br>SPX-P vs. MR-P 0.15 |
|                                                                                       | Anxiety                   | Germany | Bölte et al (2007) [51]    | ASD SPX-P n = 87 (48Mo/39Fa)<br>ASD MPX-P n = 38 (21Mo/17Fa) | OCD-P n = 37 (19Mo/18Fa)<br>EOS-P n = 34 (20Mo/14Fa)<br>MR-P n = 27 (15Mo/12Fa) | n.s.                                     | MPX-P vs. OCD-P 0.17<br>MPX-P vs. EOS-P 0.92<br>MPX-P vs. MR-P 0.29<br>SPX-P vs. OCD-p 0.01<br>SPX-P vs. EOS-P 0.66<br>SPX-P vs. MR-P 0.10 |
|                                                                                       | Phobic-anxiety            | Germany | Bölte et al (2007) [51]    | ASD SPX-P n = 87 (48Mo/39Fa)<br>ASD MPX-P n = 38 (21Mo/17Fa) | OCD-P n = 37 (19Mo/18Fa)<br>EOS-P n = 34 (20Mo/14Fa)<br>MR-P n = 27 (15Mo/12Fa) | <b>SPX-P / MPX-P &gt; OCD-P, EOS-P**</b> | MPX-P vs. OCD-P 0.25<br>MPX-P vs. EOS-P 1.33<br>MPX-P vs. MR-P 0.45<br>SPX-P vs. OCD-p 0<br>SPX-P vs. EOS-P 0.91<br>SPX-P vs. MR-P 0.19    |
|                                                                                       | Paranoid ideation         | Germany | Bölte et al (2007) [51]    | ASD SPX-P n = 87 (48Mo/39Fa)<br>ASD MPX-P n = 38 (21Mo/17Fa) | OCD-P n = 37 (19Mo/18Fa)<br>EOS-P n = 34 (20Mo/14Fa)<br>MR-P n = 27 (15Mo/12Fa) | <b>MPX-P &gt; EOS-P**</b>                | MPX-P vs. OCD-P 0.44<br>MPX-P vs. EOS-P 0.93<br>MPX-P vs. MR-P 0.57<br>SPX-P vs. OCD-p 0.19<br>SPX-P vs. EOS-P 0.65<br>SPX-P vs. MR-P 0.29 |
| <b>Schedule for Affective Disorders and Schizophrenia - Lifetime Version (SADS-L)</b> | Anxiety                   | USA     | Piven et al (1991) [68]    | ASD-P n = 81 (42Mo/39Fa)                                     | DS-P n = 34 (18Mo/16Fa)                                                         | <b>ASD-P &gt; DS-P*</b>                  |                                                                                                                                            |
|                                                                                       | Major Depressive Disorder | USA     | Piven et al (1991) [68]    | ASD-P n = 81 (42Mo/39Fa)                                     | DS-P n = 34 (18Mo/16Fa)                                                         | n.s.                                     |                                                                                                                                            |
| <b>Schedule for Affective Disorders and Schizophrenia -</b>                           | Major Depressive Disorder | USA     | Piven & Palmer (1999) [69] | MPX-P n = 48 (25Mo/23Fa)                                     | DS-P n = 60 (30Mo/30Fa)                                                         | <b>ASD-P &gt; DS-P**</b>                 |                                                                                                                                            |

|                                                                                                              |                         |     |                             |                           |                           |                              |                             |
|--------------------------------------------------------------------------------------------------------------|-------------------------|-----|-----------------------------|---------------------------|---------------------------|------------------------------|-----------------------------|
| <b>Lifetime Version Modified for the Study of Anxiety Disorders, Revised (SADS-LA-R)</b>                     | Social phobia           | USA | Piven & Palmer (1999) [69]  | MPX-P n= 48 (25Mo/23Fa)   | DS-P n = 60 (30Mo/30Fa)   | <b>ASD-P &gt; DS-P*</b>      |                             |
| <b>Parental Questionnaire (Devised by Author and results validated by consented medical records from GP)</b> | Depression              | UK  | Micali et al (2004) [70]    | ASD-P n = 152 (79Mo/73Fa) | ODP-P n = 114 (59Mo/55Fa) | <b>ASD-Mo &gt; ODP-Mo*</b>   |                             |
|                                                                                                              | Anxiety                 | UK  | Micali et al (2004) [70]    | ASD-P n = 152 (79Mo/73Fa) | ODP-P n = 114 (59Mo/55Fa) | <b>ASD-Mo &gt; ODP-Mo***</b> |                             |
| <b>The Centre for Epidemiological Studies – Depression Scales (CESD)</b>                                     | Depressed Mood          | USA | Ingersoll et al (2011) [25] | ASD-Mo n = 71 (Only Mo)   | N-Mo n = 94 (Only Mo)     | <b>ASD-Mo &gt; N-Mo*</b>     | <b>ASD-Mo vs. N-Mo 0.35</b> |
| <b>Beck Depression Inventory (BDI)</b>                                                                       | Depression              | UK  | Berthoz et al (2013) [40]   | ASD-P n = 87 (28%Fa)      | UA n = 47 (62%M)          | n.s.                         | <b>ASD-P vs. UA 0.50</b>    |
| <b>State-Trait Anxiety Inventory Form Y (STAI-Y)</b>                                                         |                         |     |                             |                           |                           |                              |                             |
| <i>State scale (STAI-S)</i>                                                                                  | Anxiety (State portion) | UK  | Berthoz et al (2013) [40]   | ASD-P n = 87 (28%Fa)      | UA n = 47 (62%M)          | n.s.                         | <b>ASD-P vs. UA 0.19</b>    |
| <i>Trait scale (STAI-T)</i>                                                                                  | Anxiety (Trait portion) | UK  | Berthoz et al (2013) [40]   | ASD-P n = 87 (28%Fa)      | UA n = 47 (62%M)          | n.s.                         | <b>ASD-P vs. UA 1.24</b>    |

Note: ASD, Autism Spectrum Disorder; BAP, Broad Autism Phenotype; BAP(+), BAP present; BAP (-), BAP absent; P, Parent; Mo, Mother; Fa, Father; M, Male; F, Female; MPX, Multiple incidence autism families; SPX, Single incidence autism families; DS, Down Syndrome; EOS, Early onset Schizophrenia; MR, Mental Retardation; N, Normative sample; OCD, Obsessive Compulsive Disorder; ODP, Other developmental problems without autism; UA, Unaffected adult

\*p<0.05; \*\*p<0.01; \*\*\*p<0.001
